1 **Thermal adaptation constrains the temperature dependence**  
2 **of ecosystem metabolism**

3  
4 Daniel Padfield<sup>1</sup>, Chris Lowe<sup>1,2\*</sup>, Angus Buckling<sup>1,2</sup>, Richard Ffrench-Constant<sup>2</sup>, Elisa  
5 Schaum<sup>1</sup>, Simon Jennings<sup>3,4</sup>, Felicity Shelley<sup>5</sup>, Jón S. Ólafsson<sup>6</sup> & Gabriel Yvon-  
6 Durocher<sup>1\*</sup>

7 **Author affiliations:**

8 <sup>1</sup> Environment and Sustainability Institute, University of Exeter, Penryn, Cornwall, TR10 9EZ, U.K.

9 <sup>2</sup> Centre for Ecology and Conservation, College of Life and Environmental Sciences, University of  
10 Exeter, Penryn, Cornwall, TR10 9FE, U.K.

11 <sup>3</sup> Centre for Environment, Fisheries and Aquaculture Science, Lowestoft, NR33 0HT, U.K.

12 <sup>4</sup> School of Environmental Sciences, Norwich Research Park, University of East Anglia, Norwich,  
13 NR4 7TJ, U.K.

14 <sup>5</sup> School of Biological and Chemical Sciences, Queen Mary University of London, London, E1 4NS,  
15 U.K. <sup>6</sup> Marine and Freshwater Research Institute, Árleyni 22, 112 Reykjavik, Iceland.

16  
17 **Corresponding authors:** Gabriel Yvon-Durocher ([g.yvon-durocher@exeter.ac.uk](mailto:g.yvon-durocher@exeter.ac.uk)) or  
18 Chris Lowe ([c.lowe@exeter.ac.uk](mailto:c.lowe@exeter.ac.uk))  
19

20 **Author contributions:** G. Y-D. and C. L. conceived the study. D.P. and G. Y-D.  
21 designed the experimental work and D. P., G. Y-D., C. L., and BIO244 students  
22 conducted the experiments. D.P. and G. Y-D. analysed the data and all authors  
23 contributed to writing the paper. The authors declare no conflict of interest.  
24

25 **Data accessibility statement:** All data will be made available on Dryad should the  
26 manuscript be accepted. R-Code for analysis will be available from the authors on  
27 request.  
28

29 **Type of Article:** Letter

30  
31 **Number of words in: Abstract:** 149; **Main Text:** 4998

32 **Number of Figures:** 3

33 **Number of Tables:** 1

34 **Number of cited references:** 50  
35  
36

37 **Keywords:** metabolic theory, thermal adaptation, global warming, gross primary  
38 production  
39

## 40 **ABSTRACT**

41 Gross primary production (GPP) is the largest flux in the carbon cycle, yet its  
42 response to global warming is highly uncertain. The temperature sensitivity of GPP is  
43 directly linked to photosynthetic physiology, but the response of GPP to warming  
44 over longer timescales could also be shaped by ecological and evolutionary processes  
45 that drive variation community structure and functional trait distributions. Here, we  
46 show that selection on photosynthetic traits within and across taxa dampen the effects  
47 of temperature on GPP across a catchment of geothermally heated streams.  
48 Autotrophs from cold streams had higher photosynthetic rates and after accounting for  
49 differences in biomass among sites, rates of ecosystem-level GPP were independent  
50 of temperature, despite a 20 °C thermal gradient. Our results suggest that thermal  
51 adaptation constrains the long-term temperature dependence of GPP, and highlights  
52 the importance of considering physiological, ecological and evolutionary mechanisms  
53 when predicting how ecosystem-level processes respond to warming.

54

## 55 **INTRODUCTION**

56 The carbon cycle is fundamentally metabolic (Falkowski *et al.* 2000). At the  
57 ecosystem level, gross primary production (GPP) represents the total amount of CO<sub>2</sub>  
58 fixed by photosynthesis into organic carbon and is the largest flux in the global  
59 carbon cycle (Beer *et al.* 2010) transferring CO<sub>2</sub> from the atmosphere to the  
60 biosphere, fuelling food webs and biological production (Field 1998). Understanding  
61 the mechanisms that shape how temperature influences rates of GPP across spatial,  
62 temporal and organisational scales is therefore an essential prerequisite to forecasting  
63 feedbacks between global warming and the carbon cycle.

64           Temperature can dictate rates of GPP over short timescales through its effects  
65 on photosynthetic physiology (Medlyn *et al.* 2002; Allen *et al.* 2005; Galmes *et al.*  
66 2015). However, it is clear that over longer timescales (e.g. decades of gradual  
67 warming) ecological and evolutionary processes that mediate temperature induced  
68 changes in biomass, community composition and local adaptation of metabolic traits  
69 could feedback to influence the emergent effects of warming on ecosystem properties  
70 (Allen *et al.* 2005; Enquist *et al.* 2007; Michaletz *et al.* 2014; Cross *et al.* 2015).  
71 Indeed a recent analysis demonstrated that most of the variation in terrestrial primary  
72 production along a latitudinal temperature gradient could be explained by changes in  
73 biomass, and after controlling for biomass, rates were independent of temperature  
74 (Michaletz *et al.* 2014). Such temperature invariance in biomass-specific rates of  
75 primary production is counterintuitive considering the well-known exponential effects  
76 of temperature on the biochemistry of metabolism (Gillooly *et al.* 2001). Furthermore,  
77 it implies that selection on photosynthetic traits that compensate for the effects of  
78 temperature on physiological rates could play a fundamental role in mediating the  
79 effects of temperature on rates of primary production in the long-term (Kerkhoff *et al.*  
80 2005; Enquist *et al.* 2007).

81           Here we investigate the interplay between the direct effects of temperature on  
82 photosynthesis, local adaptation through selection on photosynthetic traits, and  
83 changes in community biomass, on rates of gross primary production. We do so by  
84 extending the general model for ecosystem metabolism from metabolic theory  
85 (Enquist *et al.* 2003, 2007; Allen *et al.* 2005; Kerkhoff *et al.* 2005; Michaletz *et al.*  
86 2014) to include the effects of thermal adaptation on the key traits that influence  
87 individual metabolism as well as potential temperature effects on ecosystem biomass  
88 pools. We then test our model's predictions against empirical data collected from a

89 catchment of naturally warmed Icelandic geothermal streams spanning a gradient of  
90 20 °C.

91

## 92 **THEORY**

93 The metabolic theory of ecology (MTE) provides a powerful framework for  
94 understanding how temperature affects GPP by linking the photosynthetic rates of an  
95 ecosystem's constituent individuals with the size and biomass structure of the  
96 community (Enquist *et al.* 2003, 2007; Allen *et al.* 2005; Kerkhoff *et al.* 2005; Yvon-  
97 Durocher & Allen 2012; Michaletz *et al.* 2014). Organism-level metabolism,  $b(T)$ ,  
98 responds predictably to temperature, increasing exponentially up to an optimum,  
99 followed by a more pronounced exponential decline (Fig. 1a). These thermal response  
100 curves can be quantified using a modification of the Sharpe-Schoolfield equation for  
101 high temperature inactivation (Schoolfield *et al.* 1981):

$$102 \quad b(T) = \frac{b(T_c)m^\alpha e^{\frac{E}{kT_c} - \frac{1}{kT}}}{1 + e^{\frac{E_h}{kT_h} - \frac{1}{kT}}} \quad (1)$$

103 where  $b(T)$  is the rate of metabolism at temperature  $T$ , in Kelvin (K),  $k$  is  
104 Boltzmann's constant ( $8.62 \times 10^{-5}$  eV K<sup>-1</sup>),  $E$  is the activation energy (in eV),  $E_h$   
105 characterises temperature-induced inactivation of enzyme kinetics above  $T_h$ , which is  
106 the temperature at which half the enzymes are inactivated. In this expression,  $b(T_c)$  is  
107 the rate of metabolism normalised to a reference temperature (e.g. 10 °C), where no  
108 low or high temperature inactivation occurs and  $m^\alpha$  is the mass dependence of  
109 metabolic rate characterised by an exponent  $\alpha$ , that ranges between  $\frac{3}{4}$  and 1 across  
110 multicellular and unicellular autotrophs (Gillooly *et al.* 2001; DeLong *et al.* 2010).  
111 Equation 1 yields a maximum metabolic rate at an optimum temperature,

$$112 \quad T_{opt} = \frac{E_h T_h}{E_h + k T_h \ln\left(\frac{E_h}{E_p} - 1\right)} \quad (2)$$

113 The parameters in equations 1 & 2, which govern the height and shape of the thermal  
114 response curve can be considered “metabolic traits” (Padfield *et al.* 2016) and have  
115 long been known to shift as organisms adapt to new thermal environments (Berry &  
116 Bjorkman 1980; Huey & Kingsolver 1989). Equation 1 can be simplified to the  
117 Arrhenius equation,

$$118 \quad b(T) = b(T_c)m^\alpha e^{E\left(\frac{1}{kT_c} - \frac{1}{kT}\right)} \quad (3)$$

119 which captures only the rising part of the thermal response curve, if the temperatures  
120 organisms experience in the environment are below  $T_{opt}$  (Savage *et al.* 2004; Dell *et*  
121 *al.* 2011; Sunday *et al.* 2012). We use this simpler, more tractable model of the  
122 temperature dependence in the following theory, which attempts to explore the  
123 mechanisms driving the emergent temperature sensitivity of ecosystem-level gross  
124 primary production.

125 At the organism-level, the size and temperature dependence of gross  
126 photosynthesis can be characterized as:

$$127 \quad gp(T) = gp(T_c)m^\alpha e^{E_{gp}\left(\frac{1}{kT_c} - \frac{1}{kT}\right)} \quad (4)$$

128 where  $gp(T)$  is the rate of gross photosynthesis and temperature  $T$ , and  $gp(T_c)$  is the  
129 rate of gross photosynthesis normalised to a reference temperature and  $E_{gp}$  is the  
130 activation energy of gross photosynthesis. Net photosynthesis,  $np$ , which is the  
131 amount of photosynthate available for allocation to biomass production after  
132 accounting for autotroph respiration is given by,

$$133 \quad np(T) = gp(T_c)m^\alpha e^{E_{gp}\left(\frac{1}{kT_c} - \frac{1}{kT}\right)} - r(T_c)m^\alpha e^{E_r\left(\frac{1}{kT_c} - \frac{1}{kT}\right)} = np(T_c)m^\alpha e^{E_{np}\left(\frac{1}{kT_c} - \frac{1}{kT}\right)} \quad (5)$$

134 where  $np(T)$  is the rate of net photosynthesis at temperature  $T$ ,  $r(T_c)$  is the rate of  
135 respiration normalised to a reference temperature,  $T_c$ , and  $E_{np}$  and  $E_r$  are the  
136 activation energies of net photosynthesis and respiration. The form of equation 5

137 implies that the temperature sensitivity of  $np$  will not strictly follow a simple  
138 Boltzmann-Arrhenius relation (see supplementary information for a derivation of  
139  $E_{np}$ ). Nevertheless, we can approximate the temperature sensitivity of net  
140 photosynthesis using an apparent activation energy,  $E_{np}$ , with a reasonable degree of  
141 accuracy (Fig. S7).

142 Using Equation 4 and principles from MTE, the rate of gross primary  
143 productivity per unit area,  $A$ , can be approximated by the sum of the photosynthetic  
144 rates of its constituent organisms (Fig. 1c):

$$145 \quad GP_s(T) = GP(T_c) e^{E_{GP}(\frac{1}{kT_c} - \frac{1}{kT})} \quad (6)$$

146 where  $GP_s(T)$  is the rate of gross primary production in ecosystem  $s$ , at temperature

147  $T$ ,  $GP(T_c) = \frac{1}{A} \sum_{i=1}^J gp_i(T_c) m_i^\alpha$ , is the ecosystem-level metabolic normalisation,

148 where  $J$  is the total number of individual organisms,  $i$ , which comprise all autotrophs

149 in  $s$ . In equation 6, the apparent long-term temperature dependence of gross primary

150 production,  $E_{GP}$ , is assumed to be equal to that of the average temperature dependence

151 for individual-level gross photosynthesis,  $E_{gp}$ , provided that the ecosystem-level

152 normalisation,  $GP(T_c)$ , is independent of temperature (Fig. 1d). However, if  $gp_i(T_c)$

153 or total biomass,  $M_s = \frac{1}{A} \sum_{i=1}^J m_i$ , exhibit temperature dependence, for example via

154 temperature driven selection on  $gp_i(T_c)$  or covariance between resource availability,

155 temperature and  $M_s$ , then the scaling of the activation energy from individuals to

156 ecosystems will no longer hold (e.g.  $E_{GP} \neq E_{gp}$ ). Thus, ecological processes that

157 influence  $M_s$  and evolutionary dynamics which shape variation in  $gp_i(T_c)$  have the

158 potential to play an integral, but as yet underappreciated role in mediating the

159 response of ecosystem metabolism to temperature if they modify the metabolic

160 capacity of ecosystem biomass pools (but see Kerkhoff *et al.* 2005; Enquist *et al.*  
161 2007; Michaletz *et al.* 2014).

162 Previous work on aquatic and terrestrial autotrophs has shown that autotrophs  
163 adapt to long-term temperature changes by shifts in the respiratory and photosynthetic  
164 normalisation constant; up-regulating rates at low temperatures and down-regulating  
165 at high temperature, to alleviate the constraints of thermodynamics on enzyme  
166 kinetics (Atkin *et al.* 2015; Padfield *et al.* 2016; Reich *et al.* 2016; Scafaro *et al.*  
167 2016). We therefore expect  $gp_i(T_c)$  to exhibit temperature dependence along long-  
168 term thermal gradients, which in the absence of an explicit first principles derivation,  
169 we can approximate as

$$170 \quad gp_i(T_c) \approx e^{E_a \left( \frac{1}{kT_c} - \frac{1}{kT} \right)} \quad (7)$$

171 where  $E_a$  is an adaptation parameter that characterises the change in  $gp_i(T_c)$  with  
172 temperature owing to thermal adaptation. Substituting the temperature dependence for  
173  $gp_i(T_c)$  into equation 6 and simplifying, yields the following expression for the  
174 temperature dependence of gross primary production,

$$175 \quad GP_s(T) = GP(T_c) e^{E_a + E_{gp} \left( \frac{1}{kT_c} - \frac{1}{kT} \right)} \quad (8)$$

176 Under the “hotter-is-better” model of thermal adaptation (Fig. 1a), where a single  
177 activation energy governs the temperature dependence of metabolism within and  
178 across species (Gillooly *et al.* 2001; Savage *et al.* 2004; Angilletta *et al.* 2010) and  
179  $E_a = 0$ , the ecosystem-level activation energy would equal that of individual-level  
180 metabolism (i.e.  $E_{GP} = E_{gp}$ ; Fig. 1d) – this is the typical assumption made in  
181 metabolic theory (Brown *et al.* 2004; Demars *et al.* 2016). However, when  $E_a \neq 0$ ,  
182  $E_{GP} = E_a + E_{gp}$ , and the ecosystem-level activation energy will deviate from the  
183 average organism-level temperature dependence owing to the effects of thermal  
184 adaptation on  $gp_i(T_c)$ . If thermal adaptation results in complete compensation (i.e.

185  $E_a = -E_{gp}$ ; Fig. 1b), and  $M_s$  does not covary with temperature, then ecosystem-  
186 level gross primary production will be independent of temperature (i.e.  $E_{GP} = 0$ ; Fig.  
187 1d). Following the same reasoning, any temperature dependence in  $M_s$  will also result  
188 in deviations from the average individual-level activation energy. For example, recent  
189 experimental work has shown that covariance between temperature and rates of  
190 nutrient cycling can cause  $M_s$  to increase with temperature (Welter *et al.* 2015;  
191 Williamson *et al.* 2016),  $M_s \approx e^{E_b(\frac{1}{kT_c} - \frac{1}{kT})}$ , where  $E_b$  is the activation energy  
192 characterising the temperature dependence of total biomass. When  $E_b > 0$ ,  
193 substituting in the temperature dependence for  $M_s$  into equation 8 leads to an increase  
194 in the ecosystem-level activation energy regardless of the mode of thermal adaptation  
195 ( $E_{GP} = E_{gp} + E_b + E_a$ ; Fig. 1d). This model emphasises how different ecological  
196 and evolutionary mechanisms that drive temperature dependent variation in  
197 individual-level metabolic traits and/or ecosystem biomass pools can influence the  
198 emergent long-term temperature sensitivity ecosystem metabolism (Fig. 1c:d).

199 We now use measurements of the temperature dependence of organism- and  
200 ecosystem-level photosynthesis from a catchment of naturally warmed geothermal  
201 streams to test the expectations of our model and investigate how ecological and  
202 evolutionary processes shape the long-term temperature sensitivity of GPP. Critically,  
203 this system allows us to measure photosynthetic responses to temperature at both  
204 organism and ecosystem scales from sites that are in close proximity, yet differ  
205 substantially in their thermal history (i.e. 20 °C *in situ* temperature gradient among  
206 sites).

207

## 208 **METHODS**

### 209 **Study site**



210 The study was conducted in a geothermally active valley close to Hveragerdi village,  
211 45 km east of Reykjavik, Iceland. The area contains a large number of mainly  
212 groundwater-fed streams that are subjected to differential natural geothermal warming  
213 from the bedrock (O’Gorman *et al.* 2014). Twelve streams have been mapped in the  
214 valley with average temperatures ranging from 7 – 27 °C (Fig. S1 & Table S1). We  
215 measured a number of physical (width, depth, velocity) and chemical (pH,  
216 conductivity, nitrate, nitrite, soluble reactive phosphate, ammonium) variables across  
217 the stream catchment (Table S2) and none of these variables were significantly  
218 correlated with temperature (Table S3). The study was carried out during May and  
219 June in 2015 and 2016.

220

### 221 **Measuring the population level metabolic thermal response**

222 We sampled 13 of the most abundant autotrophic biofilm taxa from 8 streams  
223 spanning the catchment’s full thermal gradient. Multiple taxa were removed from four  
224 streams where more than one taxon was at high density (Table S4). Measurements  
225 first entailed characterising a photosynthesis-irradiance (PI) curve from 0 – 2000  
226  $\mu\text{mol m}^{-2} \text{s}^{-1}$  at the average stream temperature for each taxon. Net photosynthesis  
227 ( $np$ ) was measured as  $\text{O}_2$  evolution in a Clark-type oxygen electrode (Hansatech Ltd,  
228 King’s Lynn UK Chlorolab2) at increasing light intensities in intervals of  $50 \mu\text{mol}^{-1}$   
229  $\text{m}^{-2} \text{s}^{-1}$  up to  $300 \mu\text{mol}^{-1} \text{m}^{-2} \text{s}^{-1}$ , and then in intervals of  $100 \mu\text{mol}^{-1} \text{m}^{-2} \text{s}^{-1}$  up to  $1000$   
230  $\mu\text{mol}^{-1} \text{m}^{-2} \text{s}^{-1}$ , followed by 200  $\mu\text{mol}$  steps up to  $2000 \mu\text{mol}^{-1} \text{m}^{-2} \text{s}^{-1}$ . Rates of  
231 respiration ( $r$ ) were measured as  $\text{O}_2$  consumption in the dark. This yielded a PI curve  
232 from which the optimal light intensity for net photosynthesis was estimated using a  
233 modification of Eilers’ photoinhibition model (Eilers & Peeters 1988) fitted via non-  
234 linear least squares regression (Fig. S2):

$$235 \quad np(I) = \frac{np_{max}I}{(np_{max}/\alpha I_{opt}^2)I^2 + \left(1 - \left(\frac{2np_{max}}{\alpha I_{opt}}\right)\right)I + \frac{np_{max}}{\alpha}} - r \quad (9)$$

236 where  $np(I)$ , is the rate of net photosynthesis at irradiance,  $I$ ,  $np_{max}$  is the  
237 photosynthetic maximum that occurs at optimal light,  $I_{opt}$ ,  $\alpha$  controls the gradient of  
238 the initial slope and  $r$  is respiration, the rate of oxygen consumption in the dark. The  
239 optimum light intensity ( $I_{opt}$ ,  $\mu\text{mol}^{-1} \text{m}^{-2} \text{s}^{-1}$ ) for each taxon was then used for  
240 measuring net photosynthesis at all other assay temperatures in the acute thermal  
241 gradient experiments. Rates of gross photosynthesis were calculated by the  
242 summation of the measured rates of net photosynthesis and respiration.

243 Rates of photosynthesis and respiration were normalised to biomass by  
244 expressing rates per unit of chlorophyll  $a$ . Chlorophyll  $a$  extraction was achieved by  
245 grinding the sample tissue with methanol for 5 minutes, centrifugation and measuring  
246 chlorophyll  $a$  extinction coefficients on a spectrophotometer. Total chlorophyll  $a$  ( $\mu\text{g}$ )  
247 was then calculated by measuring absorbance at 750 nm, 665 nm and 632 nm.

$$248 \quad \text{Chl } a = (13.26(A_{665} - A_{750}) - 2.68(A_{665} - A_{750})) \times 10^{-3} \quad (10)$$

249 Acute temperature responses of biomass normalised gross and net  
250 photosynthesis and respiration were fitted to the modified Sharpe-Schoolfield  
251 equation for high temperature inactivation (Equation 1). Best fits for each thermal  
252 response curve were determined using non-linear least squares regression using the  
253 ‘nlsLM’ function in the ‘minpack.lm’ (Elzhov *et al.* 2009) package in R statistical  
254 software (R Core Team 2014; v3.2.2), following the methods outlined in Padfield *et*  
255 *al.*, (2016).

256 We tested for thermal adaptation by assessing whether the parameters in eqns.  
257 1 and 2 as well as the rate of gross photosynthesis at the average stream temperature,  
258  $gp(T_s)$  varied systematically with stream temperature. We fitted the metabolic traits

259 to a modified Boltzmann-Arrhenius function within a linear mixed effects modelling  
260 framework:

$$261 \ln z(T) = \ln z(T_c) + E_a \left( \frac{1}{kT_c} - \frac{1}{kT} \right) + \varepsilon^t \quad (11)$$

262 where  $z$  is the metabolic trait at stream temperature,  $T$ ,  $z(T_c)$  is the value of the trait at  
263 the mean temperature across all streams,  $T_c$ , and  $E_a$  is the activation energy that  
264 determines how much  $z$  changes as a function of  $T$  due to thermal adaptation and  $\varepsilon^t$  is  
265 a random effect on the intercept accounting for multiple measurements of the same  
266 metabolic trait of each isolated biofilm taxon (i.e. one value each for gross and net  
267 photosynthesis and respiration). We fitted eq. 11 to each metabolic trait with stream  
268 temperature, flux (3 level factor with ‘gross’ and ‘net photosynthesis’ and  
269 ‘respiration’) and their interaction as fixed effects (Table S5). Significance of the  
270 parameters were determined using likelihood ratio tests. Model selection was carried  
271 out on models fitted using maximum likelihood and the most parsimonious model  
272 was refitted using restricted maximum likelihood for parameter estimation.

273

#### 274 **Measuring *in situ* rates of ecosystem-level gross primary production**

275 Ecosystem metabolism was calculated from measurements of dissolved oxygen over  
276 time using the single station method (Odum 1956). Sensors were deployed in all  
277 streams and at multiple sites within a stream where temperature gradients existed  
278 within streams due to differential geothermal warming. Dissolved oxygen  
279 concentration and temperature were monitored at 1-minute intervals using miniDOT  
280 dissolved oxygen loggers (PME Inc) (Fig. S3 & Fig. S5). Light sensors (LI-COR Inc)  
281 were deployed simultaneously at two sites in the centre of the catchment. Physical  
282 variables of each stream, including the depth (m), width (m), velocity ( $\text{m s}^{-1}$ ), were  
283 measured along horizontal transects at 10 m intervals up to 100 m upstream of the

284 sensor deployment. Values for depth, width and velocity were averaged across the  
285 reach (Table S2).

286 The change in O<sub>2</sub> concentration at a single station between two subsequent  
287 measurements ( $\Delta DO$ ) can be approximated as:

$$288 \quad \Delta DO = \frac{[O_2]_t - [O_2]_{t-1}}{\Delta t} \quad (12)$$

289 with  $[O_2]_t$  the concentration of oxygen (mg L<sup>-1</sup>) at time  $t$  and can be modelled using a  
290 framework based on the Odum's O<sub>2</sub> change technique (Odum 1956):

$$291 \quad \Delta DO = GPP - ER \pm K \quad (13)$$

292 where  $GPP$  (g m<sup>-3</sup> hr<sup>-1</sup>) is the composite of volumetric gross primary productivity,  
293 minus volumetric ecosystem respiration,  $ER$  (g m<sup>-3</sup> hr<sup>-1</sup>) and  $K$  is the net exchange of  
294 oxygen with the atmosphere (g O<sub>2</sub> m<sup>-3</sup>). The net exchange of oxygen with the  
295 atmosphere is the product of the O<sub>2</sub> gas transfer velocity,  $k$  (m min<sup>-1</sup>), and the O<sub>2</sub>  
296 concentration gradient between the water body and the atmosphere (temperature and  
297 atmosphere corrected DO concentration at 100% saturation minus  $[O_2]_t$ ) over the  
298 measurement interval.

299 The gas transfer velocity,  $k$  (m min<sup>-1</sup>), was calculated using the surface-  
300 renewal model and corrected for the stream temperature:

$$301 \quad k = 50.8 V^{0.67} \times D^{-0.85} \times 1.024^{(T-20)} \quad (14)$$

302 where  $V$  is velocity (cm s<sup>-1</sup>),  $D$  is the mean stream depth (cm) adjusted for stream  
303 temperature,  $T$  (Bott 1996). This value was subsequently transformed into (m h<sup>-1</sup>).  
304 Estimated rates of reaeration, derived using the surface renewal model from  
305 measurements of velocity and depth, correspond well to reaeration rates measured  
306 experimentally using propane additions in an adjacent Icelandic catchment with  
307 comparable physico-chemical characteristics (see Fig. S8; Demars *et al.* 2011).

308 The net metabolic flux for a given measurement interval is equal to  $\Delta DO -$   
309  $K$ . During the night (where light  $< 5 \mu\text{mol m}^{-2} \text{s}^{-1}$ ), GPP is zero, so the net metabolic  
310 flux is equal to ER. During the day, ER was determined by interpolating average ER  
311 over the defined night period. GPP for each daytime interval was the difference  
312 between net metabolism flux and interpolated ER. Daily volumetric rates of GPP ( $\text{g}$   
313  $\text{O}_2 \text{m}^{-3} \text{day}^{-1}$ ) were calculated as the sum of the 15-minute rates over each 24-hour  
314 period. Volumetric rates were converted to areal units ( $\text{g O}_2 \text{m}^{-2} \text{day}^{-1}$ ) by multiplying  
315 by the mean water depth of the stream reach.

316 We measured autotrophic biomass density ( $\text{g Chl } a \text{m}^{-2}$ ) across the stream  
317 catchment by taking measurements of chlorophyll  $a$ . A core of  $28.27 \text{ cm}^2$  was  
318 removed from 3 randomly chosen rocks and chlorophyll  $a$  was measured using the  
319 extraction protocol detailed above. The total standing biomass,  $M_s$ , of each stream  
320 reach was estimated by multiplying average biomass density by the total reach area,  
321 which was estimated from the mean width and the distance upstream from the oxygen  
322 sensor integrated over (Chapra & Di Toro 1991; Demars *et al.* 2015),

$$323 \quad d = \frac{3v}{k_2} \quad (15)$$

324 where three times the velocity of the stream ( $v$ ;  $\text{m d}^{-1}$ ) divided by the gas transfer  
325 coefficient ( $K_2$ ;  $\text{d}^{-1}$ ) gives the approximation of the distance upstream integrated by  
326 the single station method ( $d$ ;  $\text{m}$ ) (Grace & Imberger 2006). Biomass normalised rates  
327 of GPP per stream ( $\text{g O}_2 \text{g Chl } a^{-1} \text{day}^{-1}$ ) were calculated by dividing areal rates of  
328 GPP by the total standing biomass in the upstream reach.

329 We used linear mixed-effects modelling to investigate the temperature  
330 dependence of GPP across catchment, allowing us to control for the hierarchical  
331 structure of the data (e.g. variance of days nested within years nested within streams).

332 We characterised the temperature dependence of GPP with a linearised version of the  
333 Boltzmann-Arrhenius function in a linear mixed effects model:

$$334 \ln GP_s(T) = E_{GP} \left( \frac{1}{kT_c} - \frac{1}{kT} \right) + (\langle \ln GP(T_c) \rangle + \varepsilon_p^{s/y/d}) \quad (16)$$

335 where  $GP_s(T)$  is the rate of gross primary production in stream  $s$  on year  $y$  on day  $d$  at  
336 temperature  $T$  (Kelvin),  $E_{GP}$  is the activation energy (eV) which characterises the  
337 exponential temperature sensitivity of photosynthetic rates,  $\langle \ln GP(T_c) \rangle$  is the average  
338 rate of  $GP$  across streams and days normalised to  $T_c = 283$  K (10 °C) and  $\varepsilon_p^{s/y/d}$  is a  
339 nested random effect that characterises deviations from  $\langle \ln GP(T_c) \rangle$  at the level of  $d$   
340 within  $y$  within  $s$ . Significance of the parameters and model selection was carried out  
341 as described above for the analysis of the population-level metabolic traits (Table 1).

342 We tested for the effect of total biomass and temperature on GPP across the  
343 catchment using the data from 2016 (where we also quantified autotroph biomass) by  
344 undertaking a multiple regression by expanding eq. 16 to include the effect the  
345 biomass on GPP:

$$346 \ln GP(T) = E_{GP} \left( \frac{1}{kT_c} - \frac{1}{kT} \right) + \beta \ln M_s + (\langle \ln GP(T_c) \rangle + \varepsilon_p^{s/d}) \quad (17)$$

347 where  $\beta$  characterises the power-law scaling of  $GP(T)$  with  $M_s$  and the random  
348 effects specification changed to account for deviation from  $\langle \ln GP(T_c) \rangle$  between days  
349 nested within streams. Model selection was as described above (Table 1).

350

### 351 **Inorganic nutrients**

352 Water samples for measuring dissolved inorganic nutrient concentrations ( $\text{NO}_2$ ,  $\text{NO}_3$ ,  
353  $\text{NH}_4$  and  $\text{PO}_4$ ;  $\mu\text{mol L}^{-1}$ ) were collected from each stream. Samples were filtered  
354 (Whatmann GF/F) and stored frozen at -20 °C for subsequent analysis using a  
355 segmented flow auto-analyser (Table S3) (Kirkwood 1996).

356

## 357 RESULTS

### 358 Population level metabolism

359 Macroscopic cyanobacteria, filamentous eukaryotic algae, and bryophytes were the  
360 dominant autotrophs across the catchment (Table S4). To investigate how long-term  
361 differences in temperature shaped variation in photosynthetic traits across the  
362 catchment, we sampled the most abundant autotroph taxa from 8 streams spanning the  
363 full temperature gradient and measured the acute responses of gross photosynthesis  
364 and respiration to temperatures spanning 5 to 50 °C. Gross photosynthesis and  
365 respiration followed unimodal responses to acute temperature variation and were well  
366 fit by equation 1 (Fig. 2a-b). We predicted exponential declines in the metabolic  
367 normalisation constants, moving from cold to warm environments, owing to the  
368 effects of thermal adaptation. Consistent with this hypothesis, the log-transformed  
369 rates of gross photosynthesis, ( $\ln gp(T_c)$ ) and respiration ( $\ln r(T_c)$ ) normalised to a  
370 reference temperature,  $T_c = 10$  °C, declined linearly with increasing stream  
371 temperature with the same activation energy ( $E_a = -0.64$  eV; 95% CI: -1.22 to -0.05  
372 eV; Fig. 2c). Since  $np(T_c) = gp(T_c) - r(T_c)$ , the normalisation for net  
373 photosynthesis also declined with increasing temperature with an  $E_a = -0.64$  eV.

374 Because the dominant autotroph taxa varied across the streams (Table S4), the  
375 decline in the photosynthetic trait,  $gp(T_c)$ , with increasing stream temperature is  
376 likely influenced by species sorting (e.g. filtering of species and traits from the  
377 regional species pool). To investigate whether adaptive evolution also played a role,  
378 we analysed data from only the most common genera *Nostoc*, which was distributed  
379 across 5 streams spanning a gradient of 10.2 °C.  $gp(T_c)$ ,  $np(T_c)$  and  $r(T_c)$  also  
380 decreased with increasing stream temperature in *Nostoc* with the thermal sensitivity

381 not significantly different from that of all the autotroph taxa together (Fig. S6). This  
382 trend provides evidence for local thermal adaptation. An important consequence of  
383 the decrease in  $gp(T_c)$  with increasing stream temperature was that rates of gross  
384 photosynthesis at the average temperature of each stream,  $gp(T_s)$ , were independent  
385 of temperature (Fig. 2d), indicating that species sorting and adaptation led to complete  
386 compensation of organism-level metabolism over the catchment's thermal gradient.

387 Both the optimum temperature,  $T_{opt}$ , and  $T_h$ , which is the temperature at  
388 which half the enzymes are inactivated, were positively correlated with average  
389 stream temperature (Table S5) providing further evidence for local adaptation. We  
390 found no evidence for systematic variation in the activation or inactivation energies  
391 ( $E_a$  or  $E_h$ ) across the thermal suggesting these traits are unlikely to be under  
392 temperature dependent-selection (Table S5). Previous work has often shown that  
393 photosynthesis has a lower activation energy than respiration (Allen *et al.* 2005;  
394 López-Urrutia *et al.* 2006; Padfield *et al.* 2016). In contrast, we found that the average  
395 activation energies of gross photosynthesis and respiration were not significantly  
396 different and could be characterised by a common activation energy,  $E = 0.87$  eV;  
397 95% CI = 0.77 to 0.97 eV. Similarly,  $E_h$ , which characterises inactivation of kinetics  
398 past the optimum was not significantly different between fluxes and could be  
399 characterised by a common value for respiration and photosynthesis ( $E_h = 4.91$  eV;  
400 95% CI: 3.95 – 5.97 eV).

401

#### 402 **Ecosystem level gross primary productivity**

403 Based on the observation that the activation energies of gross photosynthesis and the  
404 adaptation parameter were of equal magnitude and opposite sign, our model for the  
405 scaling of metabolism from organisms to ecosystems (Eq. 8) predicts that rates of



406 gross primary production should be independent of temperature across the catchment  
407 (e.g.  $E_{GP} = E_{gp} + E_a \approx 0$ ), provided that biomass does not covary with temperature.  
408 We measured rates of *in situ* GPP in 11 streams across the catchment's full  
409 temperature gradient in 2015 and 2016. Rates of GPP increased with average stream  
410 temperature and the long-term temperature sensitivity of GPP (characterised by fitting  
411 the Boltzmann-Arrhenius function [see Methods]) yielded an activation energy of  
412  $E_{GP} = 0.57$  eV (95% CI: 0.10 – 1.04 eV; Fig. 3a).

413 To investigate potential covariance between temperature and biomass,  $M_s$ , and  
414 its impact on the temperature dependence of GPP, we also quantified *in situ* standing  
415 autotrophic biomass. Autotroph biomass density,  $M_s$ , increased systematically with  
416 temperature across the catchment with a temperature sensitivity of  $E_b = 0.68$  eV (95%  
417 CI: 0.24 – 1.12 eV; Fig. 3b). The similarity between  $E_{GP}$  and  $E_b$  – they have 95%  
418 confidence intervals that overlap – indicates that covariance between biomass and  
419 temperature could be the main driver of the temperature dependence of GPP across  
420 the catchment.

421 We quantified the effects of both temperature and  $M_s$  on GPP using multiple  
422 regression in a mixed effects modelling framework (see Methods). The best fitting  
423 model included only  $\ln(M_s)$  as a predictor (Table 1; Fig. 3c) and after controlling for  
424 variation in  $\ln(M_s)$ , rates of GPP were independent of temperature across the  
425 catchment (Table 1; Fig. 3d). These findings are consistent with predictions from our  
426 model and provide evidence that systematic variation in the photosynthetic  
427 normalisation owing to thermal adaptation results in complete compensation of  
428 biomass-specific metabolic rates at organism and ecosystem scales.

429

430 **Discussion**

431 Understanding how ecosystem-level properties like gross primary production (GPP)  
432 will respond to global warming is of central importance to predicting the response of  
433 the carbon cycle and contributing biogeochemical and food web processes to climate  
434 change. It is however a major challenge that requires an integration of physiological,  
435 ecological and evolutionary processes that together shape the emergent response of  
436 ecosystem metabolism to long-term changes in temperature. We have addressed this  
437 key problem by extending the general model of ecosystem metabolism from  
438 metabolic theory (Enquist *et al.* 2003, 2007; Allen *et al.* 2005; Kerkhoff *et al.* 2005)  
439 and testing its predictions at organism and ecosystem scales in a catchment of  
440 naturally warmed geothermal streams. Our model and analyses demonstrate that  
441 temperature-dependent selection on organism-level metabolic traits and shifts in  
442 ecosystem biomass can be as important as the direct effects of temperature on  
443 metabolism in shaping the temperature dependence of GPP.

444 Our model predicted that when the temperature dependence of the metabolic  
445 normalisation constant across taxa inhabiting environments with different thermal  
446 histories is of a similar magnitude but opposing sign to that of organism-level  
447 metabolism, the two temperature sensitivities cancel, rendering biomass-specific  
448 metabolic rates independent of temperature. Measurements of the thermal response  
449 curves for photosynthesis and respiration from the autotrophs isolated across the 20  
450 °C *in situ* gradient provided strong support for this prediction, with rates of gross  
451 photosynthesis invariant with respect to differences in average *in situ* temperatures  
452 and activation energies of organism-level gross photosynthesis and the photosynthetic  
453 normalisation,  $gp(T_c)$ , across taxa that were not significantly different and of  
454 opposite sign.

455           The exponential decline in  $gp(T_c)$  along the *in situ* thermal gradient primarily  
456 reflected turnover in the composition of the dominant autotroph taxa across the  
457 streams driven by species sorting. This result is in line with work demonstrating  
458 declines in the metabolic normalisation constant across vascular plant species along  
459 broad-scale latitudinal gradients in terrestrial ecosystems (Atkin *et al.* 2015).  
460 However, we also found a comparable negative temperature dependence of  $gp(T_c)$  in  
461 the genera, *Nostoc*, which was distributed across 5 streams, indicating that  
462 evolutionary adaptation within taxa was also an important determinant of variation in  
463 this key trait among sites in our study. This finding is consistent with work  
464 demonstrating down-regulation of the metabolic normalisation in a unicellular alga  
465 via rapid (e.g. over 100 generations or 45 days) evolutionary adaptation to an  
466 experimental thermal gradient in the laboratory (Padfield *et al.* 2016). Collectively,  
467 this work highlights that changes in the metabolic normalisation result from  
468 temperature-driven selection both within and across species and can give rise to  
469 temperature invariance of metabolic rates along thermal gradients (Fig. 1b).

470           Our work shows that the mode of thermal adaptation, in driving complete  
471 temperature compensation of organism-level metabolism, had important implications  
472 for understanding the temperature dependence of ecosystem-level GPP across the  
473 catchment. GPP increased with temperature across the catchment (Fig. 3a), but it did  
474 so because biomass also positively covaried with temperature (Fig. 3b). After  
475 accounting for biomass, GPP was independent of temperature (Fig. 3c), consistent  
476 with the effects of thermal adaptation in driving temperature compensation of  
477 organism-level metabolism. These findings confirm the predictions of our model and  
478 previous suggestions (Kerkhoff *et al.* 2005; Enquist *et al.* 2007) that local adaptation  
479 of metabolic traits can yield the paradoxical phenomenon that rates of ecosystem

480 metabolism are independent of temperature over thermal gradients that have been  
481 maintained over long timescales.

482 A great deal of empirical and theoretical work is still required to develop a  
483 complete, general theory that predicts how ecosystem properties emerge from  
484 evolutionary and community processes. Our work adds to recent efforts to this end  
485 (Enquist *et al.* 2007; Yvon-Durocher & Allen 2012; Schramski *et al.* 2015) by  
486 showing how temperature dependence of ecosystem biomass and the organism-level  
487 photosynthetic normalisation alter the emergent temperature sensitivity of ecosystem-  
488 level GPP. One important gap in the theory presented here is a mechanistic model for  
489 the temperature dependence of the metabolic normalisation owing to thermal  
490 adaptation. Our representation in equation 7 is merely a statistical description of an  
491 empirical phenomenon. The metabolic cold adaptation hypothesis seeks to explain the  
492 observation that species from cold environments often have higher mass-specific  
493 metabolic rates compared to counterparts from warmer regions as an evolutionary  
494 adaptation to compensate for lower biochemical reaction rates (Addo-Bediako *et al.*  
495 2002). However, a quantitative, first principles derivation of this pattern remains  
496 elusive. Recent work on autotrophs has proposed that down-regulation of respiration  
497 rates as organisms adapt to warmer environments is driven by a necessity to maintain  
498 the carbon-use efficiency above a threshold when rates of respiration are more  
499 sensitive to temperature than those of photosynthesis (Padfield *et al.* 2016). Yet, as  
500 we have shown here, the assumption that the activation energy of respiration is  
501 always larger than that of photosynthesis does not always hold.

502 A better understanding of the mechanisms that give rise to the emergence of  
503 ecosystem properties is central to improving predictions of how global warming will  
504 alter the feedbacks between the biosphere on the carbon cycle (Levin 1998; Ziehn *et*

505 *al.* 2011; Booth *et al.* 2012). Incorporating evolution into earth system and ecosystem  
506 models should be considered as a priority, especially in light of our finding that  
507 thermal adaptation can completely override the direct effects of temperature on  
508 metabolic rates. However, despite much recent progress (Smith & Dukes 2013;  
509 Daines *et al.* 2014; Smith *et al.* 2016), substantial work remains.

510 We capitalised on a ‘natural experiment’ using a geothermally heated stream  
511 catchment to show that thermal adaptation of photosynthesis drives an equivalence in  
512 biomass normalised GPP over a 20 °C *in situ* temperature gradient. Our results  
513 suggest that local thermal adaptation plays a key role in determining how metabolic  
514 rates scale from populations to ecosystems and questions the assumption that the  
515 effects of temperature on enzyme kinetics can be applied to assess the long-term  
516 effects of temperature on ecosystem metabolism (Demars *et al.* 2016). They also shed  
517 light on the way in which the interplay between ecological and evolutionary processes  
518 could influence the response of the carbon cycle, and hence constituent food web and  
519 biogeochemical processes, to future environmental change.

520

## 521 **References**

522

523 1. Addo-Bediako, A., Chown, S.L. & Gaston, K.J. (2002). Metabolic cold adaptation  
524 in insects : a large-scale perspective. *Funct. Ecol.*, 332–338

525

526 2. Allen, A.P., Gillooly, J.F. & Brown, J.H. (2005). Linking the global carbon cycle to  
527 individual metabolism. *Funct. Ecol.*, 19, 202–213

528

529 3. Angilletta, M.J., Huey, R.B. & Frazier, M.R. (2010). Thermodynamic effects on

- 530 organismal performance: is hotter better? *Physiol. Biochem. Zool. Ecol. Evol.*  
531 *Approaches*, 83, 197–206  
532  
533 4. Atkin, O.K., Bloomfield, K.J., Reich, P.B., Tjoelker, M.G., Asner, G.P., Bonal, D.,  
534 *et al.* (2015). Global variability in leaf respiration in relation to climate, plant  
535 functional types and leaf traits. *New Phytol.*, 206, 614–636  
536  
537 5. Beer, C., Reichstein, M., Tomelleri, E., Ciais, P., Jung, M. & Carvalhais, N. (2010).  
538 Terrestrial gross carbon dioxide uptake: Global distribution and covariation with  
539 climate. *Science*, 329, 834–839  
540  
541 6. Berry, J. & Bjorkman, O. (1980). Photosynthetic response and adaptation to  
542 temperature in higher plants. *Annu. Rev. Plant Physiol.*, 31, 491–543  
543  
544 7. Booth, B.B.B., Jones, C.D., Collins, M., Totterdell, I.J., Cox, P.M., Sitch, S., *et al.*  
545 (2012). High sensitivity of future global warming to land carbon cycle processes.  
546 *Environ. Res. Lett.*, 7, 24002  
547  
548 8. Bott, T. (1996). Primary productivity and community respiration. In: *Methods*  
549 *stream Ecol. Elsevier Acad. Press. San Diego*  
550  
551 9. Brown, J., Gillooly, J., Allen, A., Savage, V. & West, G. (2004). Toward a  
552 metabolic theory of ecology. *Ecology*, 85(7), 1771–1789  
553  
554 10. Chapra, S. & Di Toro, D. (1991). Delta method for estimating primary production,

- 555 respiration, and reaeration in streams. *J. Environ. Eng.*, 117, 640–655
- 556
- 557 11. Cross, W.F., Hood, J.M., Benstead, J.P., Hury, A.D. & Nelson, D. (2015).
- 558 Interactions between temperature and nutrients across levels of ecological
- 559 organization. *Glob. Chang. Biol.*, 21, 1025–1040
- 560
- 561 12. Daines, S., Clark, J. & Lenton, T. (2014). Multiple environmental controls on
- 562 phytoplankton growth strategies determine adaptive responses of the N : P ratio. *Ecol.*
- 563 *Lett.*, 17, 414–425
- 564
- 565 13. Dell, A.I., Pawar, S. & Savage, V.M. (2011). Systematic variation in the
- 566 temperature dependence of physiological and ecological traits. *Proc. Natl. Acad. Sci.*
- 567 *U. S. A.*, 108, 10591–6
- 568
- 569 14. DeLong, J.P., Okie, J.G., Moses, M.E., Sibly, R.M. & Brown, J.H. (2010). Shifts
- 570 in metabolic scaling, production, and efficiency across major evolutionary transitions
- 571 of life. *Proc. Natl. Acad. Sci. U. S. A.*, 107, 12941–5
- 572
- 573 15. Demars, B.O.L., Gíslason, G.M., Ólafsson, J.S., Manson, J.R., Friberg, N., Hood,
- 574 J.M., *et al.* (2016). Impact of warming on CO<sub>2</sub> emissions from streams countered by
- 575 aquatic photosynthesis. *Nat. Geosci.*, 9, 758–761
- 576
- 577 16. Demars, B.O.L., Russell Manson, J., Ólafsson, J.S., Gíslason, G.M.,
- 578 Gudmundsdóttir, R., Woodward, G., *et al.* (2011). Temperature and the metabolic
- 579 balance of streams. *Freshw. Biol.*, 56, 1106–1121

580

581 17. Demars, B.O.L., Thompson, J. & Manson, J.R. (2015). Stream metabolism and the

582 open diel oxygen method: Principles, practice, and perspectives. *Limnol. Oceanogr.*

583 *Methods*, 13, 356–374

584

585 18. Eilers, P.H. & Peeters, J.C. (1988). A model for the relationship between light

586 intensity and the rate of photosynthesis in phytoplankton. *Ecol. Modell.*, 42, 199–215

587

588 19. Elzhov, T., Mullen, K. & Bolker, B. (2009). minpack. lm: R Interface to the

589 Levenberg-Marquardt Nonlinear Least-Squares Algorithm Found in MINPACK. *R*

590 *Package version*

591

592 20. Enquist, B.J., Economo, E.P., Huxman, T.E., Allen, A.P., Ignace, D.D. & Gillooly,

593 J.F. (2003). Scaling metabolism from organisms to ecosystems. *Nature*, 423, 639–42

594

595 21. Enquist, B.J., Kerkhoff, A.J., Huxman, T.E. & Economo, E.P. (2007). Adaptive

596 differences in plant physiology and ecosystem paradoxes: Insights from metabolic

597 scaling theory. *Glob. Chang. Biol.*, 13, 591–609

598

599 22. Falkowski, P., Scholes, R.J., Boyle, E., Canadell, J., Canfield, D., Elser, J., *et al.*

600 (2000). The global carbon cycle : A test of our knowledge of earth as a system.

601 *Science*, 290, 291–297

602

603 23. Field, C.B. (1998). Primary production of the biosphere: Integrating terrestrial and

604 oceanic components. *Science*, 281, 237–240



605

606 24. Galmes, J., Kapralov, M., Copolovici, L., Hermida-Carrera, C. & Niinemets, U.  
607 (2015). Temperature responses of the Rubisco maximum carboxylase activity across  
608 domains of life : phylogenetic signals , trade-offs , and importance for carbon gain.  
609 *Photosynth. Res.*, 123, 183–201

610

611 25. Gillooly, J.F., Brown, J.H., West, G.B., Savage, V.M. & Charnov, E.L. (2001).  
612 Effects of size and temperature on metabolic rate. *Science*, 293, 2248–51

613

614 26. Grace, M.R and Imberger, S.J. "Stream Metabolism: Performing & Interpreting  
615 Measurements". *Water Studies Centre Monash University, Murray Darling Basin*  
616 *Commission and New South Wales Department of Environment and Climate Change*  
617 (2006).

618

619 27. Huey, R.B. & Kingsolver, J.G. (1989). Evolution of thermal sensitivity of  
620 ectotherm performance. *Trends Ecol. Evol.*, 4, 131–135

621

622 28. Kerkhoff, A.J., Enquist, B.J., Elser, J.J. & Fagan, W.F. (2005). Plant allometry,  
623 stoichiometry and the temperature-dependence of primary productivity. *Glob. Ecol.*  
624 *Biogeogr.*, 14

625

626 29. Kirkwood, D. (1996). Nutrients: practical notes on their determination in seawater.  
627 *ICES Tech. Mar. Environ. Sci.*

628

629 30. Levin, S.A. (1998). Ecosystems and the biosphere as complex adaptive systems.

630 *Ecosystems*, 1, 431–436

631

632 31.López-Urrutia, A., San Martín, E., Harris, R.P. & Irigoien, X. (2006). Scaling the  
633 metabolic balance of the oceans. *Proc. Natl. Acad. Sci. U. S. A.*, 103, 8739–8744

634

635 32.Medlyn, B.E., Dreyer, E., Ellsworth, D., Forstreuter, M., Harley, P.C.,  
636 Kirschbaum, M.U.F., *et al.* (2002). Temperature response of parameters of a  
637 biochemically based model of photosynthesis . II . A review of experimental data, 61,  
638 1167–1179

639

640 33.Michaletz, S.T., Cheng, D., Kerkhoff, A.J. & Enquist, B.J. (2014). Convergence of  
641 terrestrial plant production across global climate gradients. *Nature*, 512, 39–43

642

643 34.O’Gorman, E.J., Benstead, J.P., Cross, W.F., Friberg, N., Hood, J.M., Johnson,  
644 P.W., *et al.* (2014). Climate change and geothermal ecosystems: Natural laboratories,  
645 sentinel systems, and future refugia. *Glob. Chang. Biol.*, 20, 3291–3299

646

647 35.Odum, H.T. (1956). Primary production in flowing waters. *Limnol. Oceanogr.*, 1,  
648 102–117

649

650 36.Padfield, D., Yvon-durocher, G., Buckling, A., Jennings, S. & Yvon-durocher, G.  
651 (2016). Rapid evolution of metabolic traits explains thermal adaptation in  
652 phytoplankton. *Ecol. Lett.*, 19, 133–142

653

654 37.Reich, P.B., Sendall, K.M., Stefanski, A., Wei, X., Rich, R.L. & Montgomery,

- 655 R.A. (2016). Boreal and temperate trees show strong acclimation of respiration to  
656 warming. *Nature*, 531, 633–636  
657
- 658 38.Savage, V.M., Gillooly, J.F., Brown, J.H. & Charnov, E.L. (2004). Effects of body  
659 size and temperature on population growth. *Am. Nat.*, 163, 429–41  
660
- 661 39.Scafaro, A.P., Xiang, S., Long, B.M., Bahar, N.H.A., Weerasinghe, L.K., Creek,  
662 D., *et al.* (2016). Strong thermal acclimation of photosynthesis in tropical and  
663 temperate wet-forest tree species: the importance of altered Rubisco content. *Glob.*  
664 *Chang. Biol.*  
665
- 666 40.Schoolfield, R.M., Sharpe, P.J. & Magnuson, C.E. (1981). Non-linear regression  
667 of biological temperature-dependent rate models based on absolute reaction-rate  
668 theory. *J. Theor. Biol.*, 88, 719–731  
669
- 670 41.Schramski, J.R., Dell, A.I., Grady, J.M., Silby, R.M. & Brown, J.H. (2015).  
671 Metabolic theory predicts whole-ecosystem properties. *PNAS*, 112, 2617–2622  
672
- 673 42.Smith, N.G. & Dukes, J.S. (2013). Plant respiration and photosynthesis in global-  
674 scale models: incorporating acclimation to temperature and CO<sub>2</sub>. *Glob. Chang. Biol.*,  
675 19, 45–63  
676
- 677 43.Smith, N.G., Malyshev, S.L., Shevliakova, E., Kattge, J. & Dukes, J.S. (2016).  
678 Foliar temperature acclimation reduces simulated carbon sensitivity to climate. *Nat.*  
679 *Clim. Chang.*, 6, 407–411

680

681 44.Sunday, J.M., Bates, A.E. & Dulvy, N.K. (2012). Thermal tolerance and the global  
682 redistribution of animals. *Nat. Clim. Chang.*, 2, 1–5

683

684 45.Team, R.C. (2014). R: A language and environment for statistical computing. R  
685 Foundation for Statistical Computing, Vienna, Austria, 2012

686

687 46.Welter, J.R., Benstead, J.P., Cross, W.F., Hood, J.M., Hury, A.D., Johnson, P.W.,  
688 *et al.* (2015). Does N<sub>2</sub> fixation amplify temperature dependence of ecosystem  
689 metabolism? *Ecology*, 96, 603–610

690

691 47.Williamson, T.J., Cross, W.F., Benstead, J.P., Gislason, G.M., Hood, J.M., Hury,  
692 A.D., *et al.* (2016). Warming alters coupled carbon and nutrient cycles in  
693 experimental streams. *Glob. Chang. Biol.*, 22, 2152–2164

694

695 48.Yvon-Durocher, G. & Allen, A.P. (2012). Linking community size structure and  
696 ecosystem functioning using metabolic theory. *Philos. Trans. R. Soc. Lond. B. Biol.*  
697 *Sci.*, 367, 2998–3007

698

699 49.Yvon-Durocher, G., Allen, A.P., Bastviken, D., Conrad, R., Gudas, C., St-Pierre,  
700 A., *et al.* (2014). Methane fluxes show consistent temperature dependence across  
701 microbial to ecosystem scales. *Nature*, 507, 488–491

702

703 50.Ziehn, T., Kattge, J., Knorr, W. & Scholze, M. (2011). Improving the  
704 predictability of global CO<sub>2</sub> assimilation rates under climate change. *Geophys. Res.*

705 *Lett.*, 38, 1–5

706

707 **Acknowledgments:** We thank Benoit Demars for providing reaeration data and  
708 comments that significantly improved the manuscript. This study was supported a  
709 NERC Case studentship awarded to DP, GYD and SJ, an ERC starting grant awarded  
710 to GYD, and the University of Exeter.

711

712

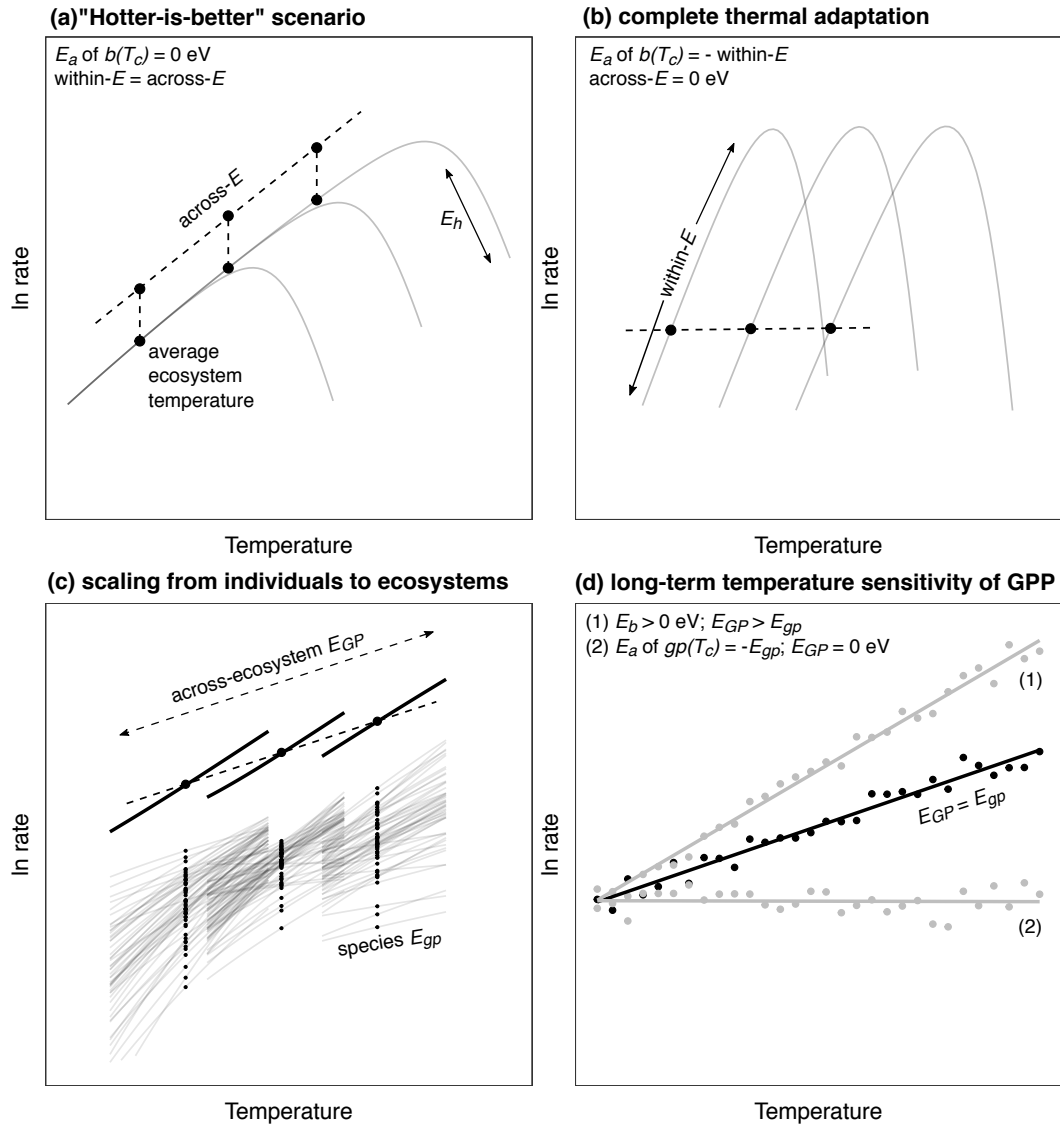

713

714 **Figure 1 | Scaling metabolism from organisms to ecosystems.** (a) In a “hotter-is-  
 715 better” scenario, thermodynamic constraints entirely dictate individual metabolic rates  
 716 such that adaptation can only occur by moving peak performance up and down an  
 717 “across-species” thermal performance curve. (b) Under complete thermal adaptation,  
 718 an equalisation of peak rates occurs through upregulation of metabolic rates at cold,  
 719 and downregulation of rates at high temperatures. (c) The long-term ecosystem  
 720 temperature response,  $E_{GP}$ , is an emergent property dependent on the thermal  
 721 response of each ecosystem’s constituent individuals. (d) If local thermal adaptation  
 722 drives temperature dependence in the metabolic normalisation (e.g. as expected under  
 723 the ‘complete thermal adaptation’ hypothesis) or standing biomass is temperature  
 724 dependent, the long-term temperature sensitivity of ecosystem metabolism may  
 725 deviate away from the average activation energy of individual metabolism.

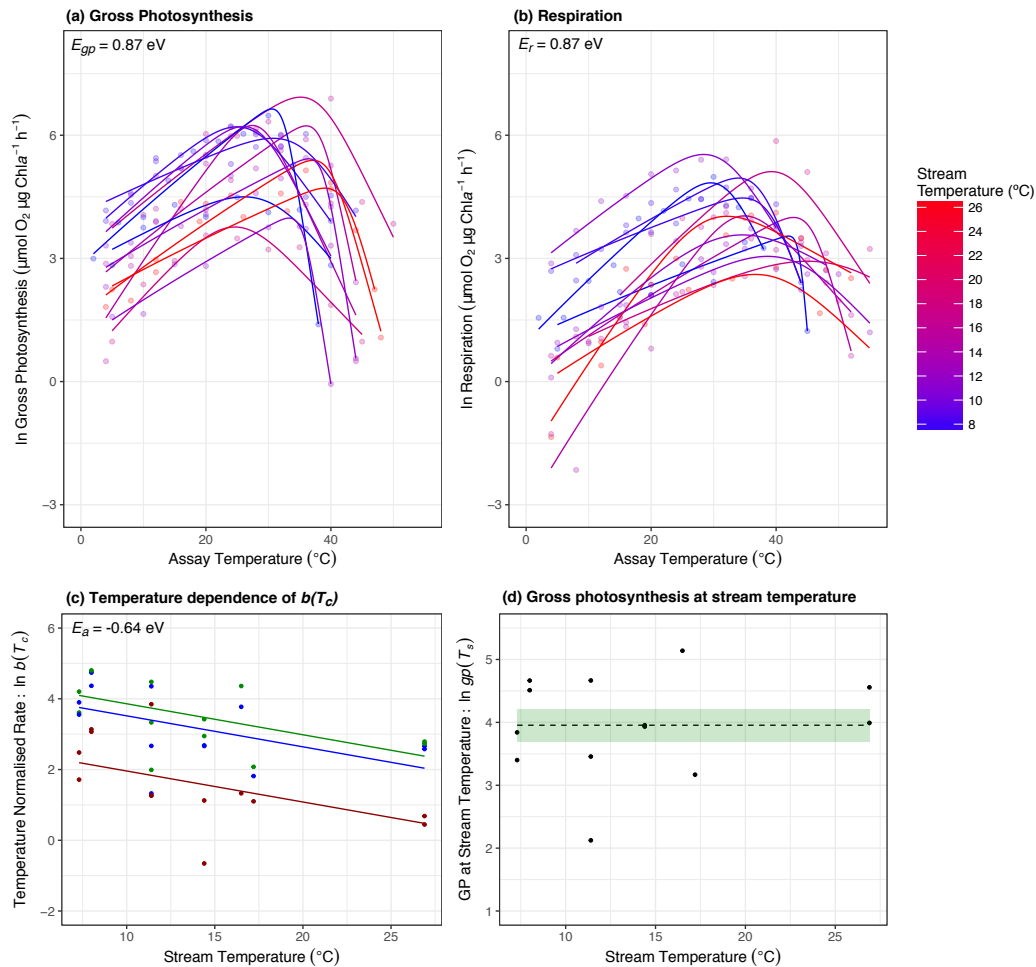

726  
727  
728  
729  
730  
731  
732  
733  
734  
735  
736  
737  
738  
739

**Figure 2 | Patterns of metabolic thermal adaptation.** (a,b) Acute thermal response curves for gross photosynthesis and respiration were measured for each isolated autotroph from streams spanning average temperatures from 7  $^{\circ}\text{C}$  (blue) to 27  $^{\circ}\text{C}$  (red). Fitted lines are based on the best-fit parameters from non-linear least squares regression using the modified Sharpe-Schoolfield model (see Methods). (c) Metabolic rates normalised to 10  $^{\circ}\text{C}$ ,  $b(T_c)$ , decrease exponentially with increasing stream temperature for gross photosynthesis (green), net photosynthesis (blue) and respiration (red) (d) Rates of gross photosynthesis at the average stream temperature showed no temperature dependence. Fitted lines and coloured bands in (c) and (d) represent the best fit and the uncertainty of the fixed effects of the best linear mixed effect model.

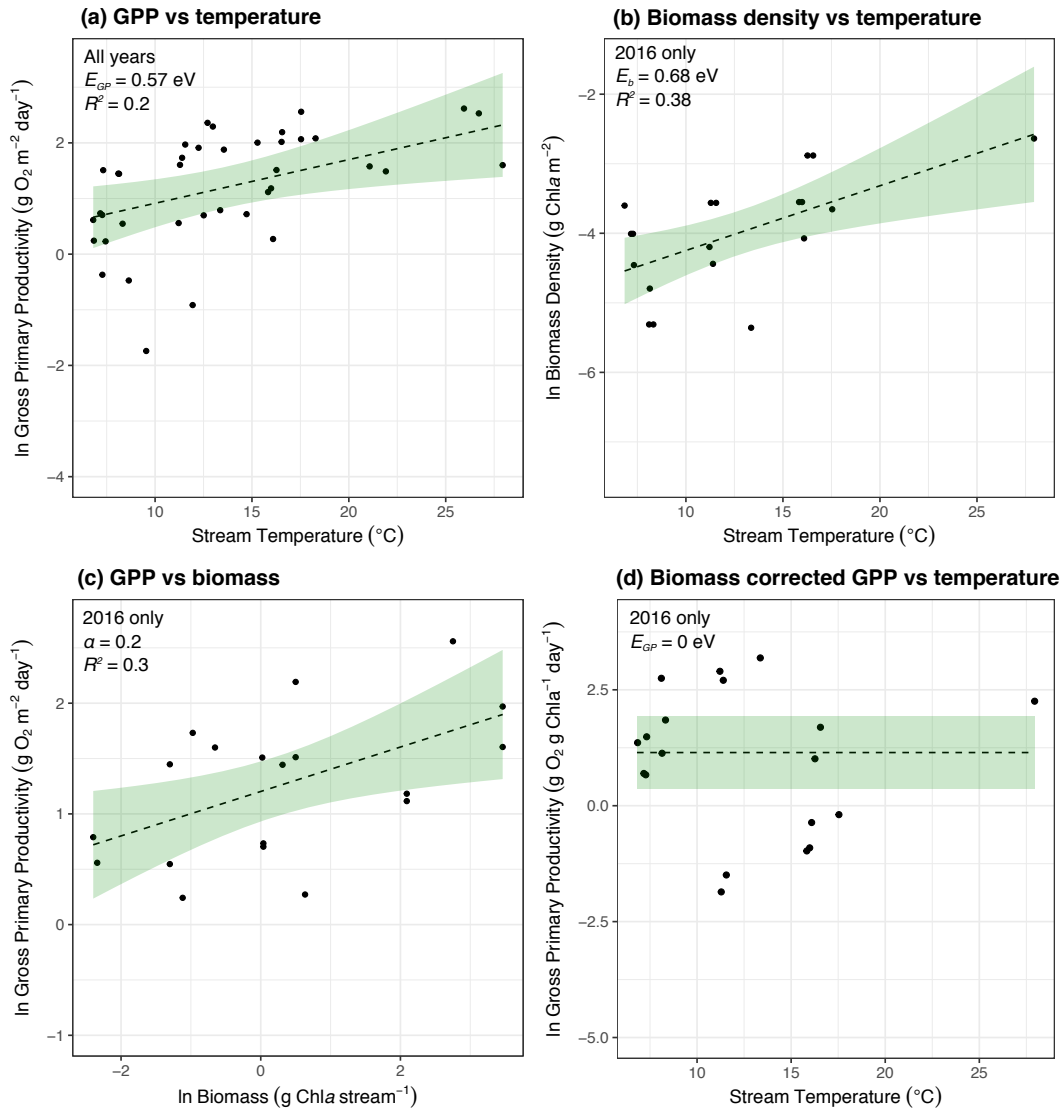

740  
741  
742

743 **Figure 3 | The effects of temperature and biomass on gross primary productivity.**  
744 Gross primary productivity (a) and biomass density (b) increase with temperature  
745 across the catchment. (c) A multiple regression shows that variation in GPP is driven  
746 primarily by changes in biomass. (d) After accounting for biomass, rates of GPP are  
747 invariant with respect to temperature across the catchment. Fitted lines in (a, c, d)  
748 represent the best fit and the uncertainty of the fixed effects of the best linear mixed  
749 effect model (Table 1). In (b) the lines represent the fitted line and associated  
750 confidence interval of a linear regression.



751 **Table 1 | Results of the linear mixed effects model analysis for gross primary**  
 752 **productivity (GPP) for all years and 2016 only.** The results of the model selection  
 753 procedure on the fixed effect terms are given and the most parsimonious models are  
 754 highlighted in bold. Analyses reveal that GPP increased significantly with stream  
 755 temperature. The analyses for 2016 show that the observed temperature response was  
 756 driven by covariance between biomass and temperature rather than the direct effects  
 757 of temperature on rates of photosynthesis *per se*.

| Model                                                    | d.f.     | AICc        | log Lik      | L-ratio | P            |
|----------------------------------------------------------|----------|-------------|--------------|---------|--------------|
| <b>All years :</b>                                       |          |             |              |         |              |
| random effects structure<br>random = 1   stream/year/day |          |             |              |         |              |
| fixed effects structure                                  |          |             |              |         |              |
| 1. <b>ln GPP ~ 1 + stream temperature</b>                | <b>6</b> | <b>82.9</b> | <b>-34.0</b> |         |              |
| 2. ln flux ~ 1                                           | 5        | 85.8        | -36.9        | 5.80    | <b>0.016</b> |
| <b>2016 only :</b>                                       |          |             |              |         |              |
| random effects structure<br>random = 1   stream/day      |          |             |              |         |              |
| fixed effects structure                                  |          |             |              |         |              |
| 1. ln GPP ~ 1 + stream temperature + biomass             | 6        | 48.8        | -14.9        |         |              |
| 2. <b>ln GPP ~ 1 + biomass</b>                           | <b>5</b> | <b>45.3</b> | <b>-15.3</b> | 0.87    | 0.35         |
| 3. ln flux ~ 1                                           | 4        | 45.8        | -17.4        | 4.25    | <b>0.04</b>  |

758

759

760

## SUPPLEMENTARY INFORMATION

761

for

762

## Thermal adaptation constrains the temperature dependence

763

## of ecosystem metabolism

764

765 Daniel Padfield<sup>1</sup>, Chris Lowe<sup>1,2\*</sup>, Angus Buckling<sup>1,2</sup>, Richard French-Constant<sup>2</sup>,

766 Simon Jennings<sup>3,4</sup>, Felicity Shelley<sup>5</sup>, Jón S. Ólafsson<sup>6</sup> & Gabriel Yvon-Durocher<sup>1\*</sup>

767

### 768 Author affiliations:

769 <sup>1</sup> Environment and Sustainability Institute, University of Exeter, Penryn, Cornwall, TR10 9EZ, U.K.

770 <sup>2</sup> Centre for Ecology and Conservation, College of Life and Environmental Sciences, University of

771 Exeter, Penryn, Cornwall, TR10 9FE, U.K.

772 <sup>3</sup> Centre for Environment, Fisheries and Aquaculture Science, Lowestoft, NR33 0HT, U.K.

773 <sup>4</sup> School of Environmental Sciences, Norwich Research Park, University of East Anglia, Norwich,

774 NR4 7TJ, U.K.

775 <sup>5</sup> School of Biological and Chemical Sciences, Queen Mary University of London, London, E1 4NS,

776 U.K.

777 <sup>6</sup> Marine and Freshwater Research Institute, Árleyni 22, 112 Reykjavik, Iceland.

778

779 **Corresponding authors:** Gabriel Yvon-Durocher ([g.yvon-durocher@exeter.ac.uk](mailto:g.yvon-durocher@exeter.ac.uk)) or

780 Chris Lowe ([c.lowe@exeter.ac.uk](mailto:c.lowe@exeter.ac.uk))

781

782

783 Section 1. Supplementary Tables and Figures  
784  
785  
786

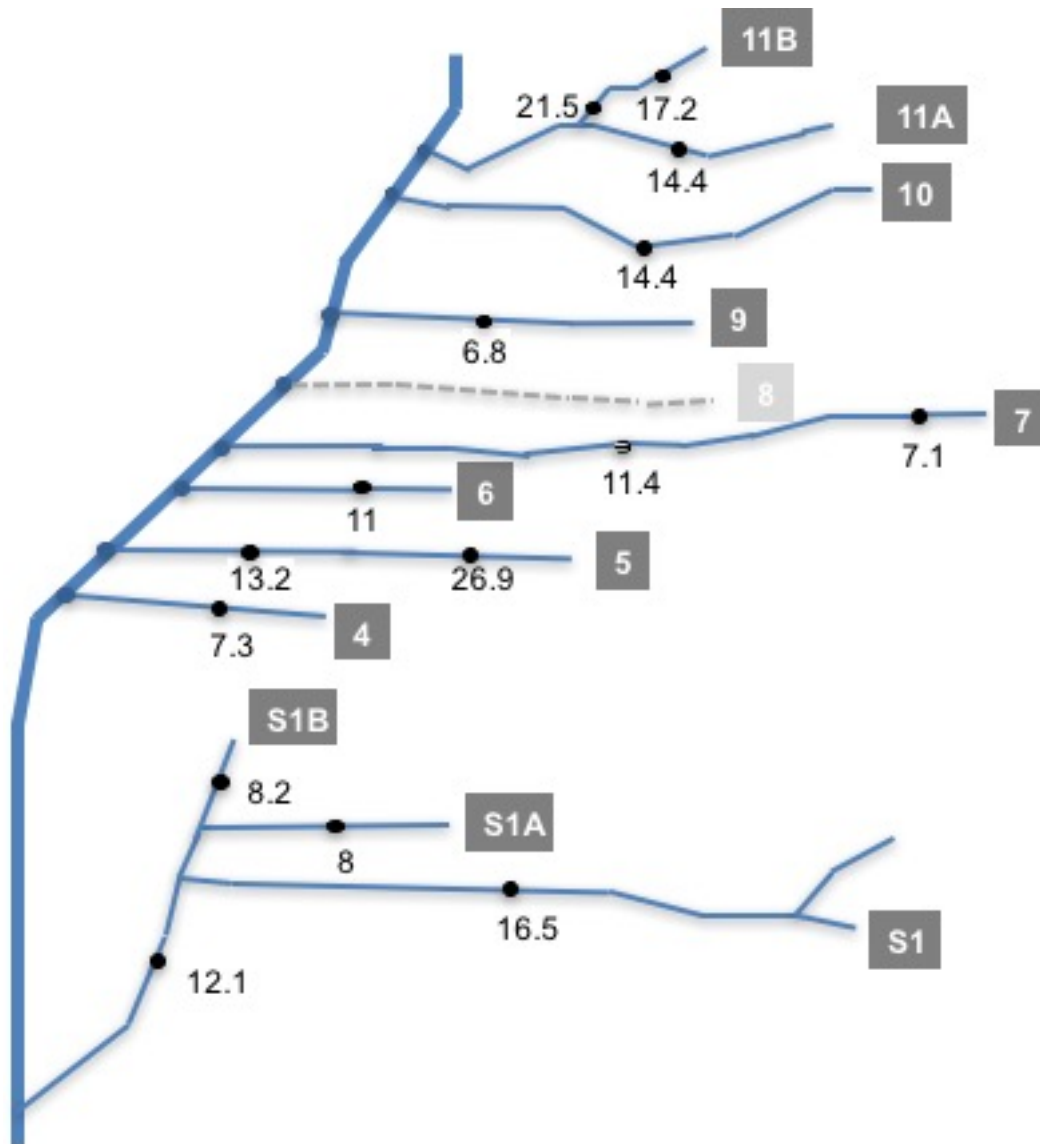

787  
788 **Figure S1.** Map of the geothermal stream system in a valley near Hveragerdi, SW  
789 Iceland. Temperatures measured at various locations across the catchment are also  
790 given.

791  
792

793 **Table S1.** Mean, minimum and maximum temperature values averaged across days  
794 and years (May 2015, May 2016) in the 15 sites. Values are based on a temperature  
795 estimates taken at 1 minute intervals. The streams are listed with increasing mean  
796 temperature.  
797

798

| Stream      | Temperature (°C) |         |         |
|-------------|------------------|---------|---------|
|             | Mean             | Minimum | Maximum |
| S9          | 6.8              | 5.3     | 7.9     |
| S7 : high   | 7.1              | 6.7     | 7.9     |
| S4          | 7.3              | 5.1     | 8.9     |
| S1A         | 8                | 4.5     | 11.8    |
| S1B         | 8.2              | 7.1     | 9.7     |
| S6          | 11               | 7.3     | 14.1    |
| S7 : low    | 11.4             | 10.4    | 12.1    |
| S1 : low    | 12.1             | 9.7     | 16.3    |
| S5 : low    | 13.2             | 12.1    | 14.8    |
| S10         | 14.4             | 10.4    | 16.9    |
| S11A        | 14.4             | 12.4    | 16.6    |
| S1 : high   | 16.5             | 13.3    | 18.8    |
| S11B : high | 17.2             | 14.7    | 19.6    |
| S11B : low  | 21.5             | 19.8    | 23.4    |
| S5 : high   | 26.9             | 24.8    | 28.6    |

**Table S2.** Key physical and chemical features of the 15 sites investigated

| stream      | width (m) | depth (m) | velocity (m s <sup>-1</sup> ) | pH   | conductivity (μS m <sup>-1</sup> ) | nutrients (μmol L <sup>-1</sup> ) |                 |                 |                 |
|-------------|-----------|-----------|-------------------------------|------|------------------------------------|-----------------------------------|-----------------|-----------------|-----------------|
|             |           |           |                               |      |                                    | NO <sub>2</sub>                   | NO <sub>3</sub> | NH <sub>4</sub> | PO <sub>4</sub> |
| S9          | 0.41      | 0.027     | 0.11                          | 7.57 | 173.3                              | 0.29                              | 0.23            | 0.27            | 0.86            |
| S7 : high   | 0.4       | 0.053     | 0.3                           | 7.43 | 359.1                              | 0.22                              | 0.44            | 0.28            | 0.7             |
| S4          | 0.46      | 0.06      | 0.36                          | 7.27 | 204.6                              | 0.2                               | 0.08            | 0.22            | 0.14            |
| S1A         | 0.59      | 0.07      | 0.5                           | 7.40 | 230.9                              | 0.25                              | 0.4             | 0.7             | 0.54            |
| S1B         | 0.42      | 0.058     | 0.14                          | 7.50 | 462.4                              | 0.28                              | 0.25            | 0.18            | 0.17            |
| S6          | 0.19      | 0.029     | 0.12                          | 7.43 | 289.6                              | 0.22                              | 0.4             | 0.21            | 1.02            |
| S7 : low    | 0.3       | 0.043     | 0.4                           | 7.43 | 304.7                              | 0.22                              | 0.44            | 0.28            | 0.7             |
| S1 : low    | 1.1       | 0.13      | 0.81                          | 7.36 | 305.2                              | 0.26                              | 0.26            | 0.48            | 0.35            |
| S5 : low    | 0.32      | 0.041     | 0.09                          | 7.63 | 273.6                              | 0.22                              | 0.57            | 0.17            | 0.14            |
| S10         | 0.22      | 0.109     | 0.24                          | 7.53 | 167.0                              | 0.35                              | -               | 0.24            | 0.74            |
| S11A        | 0.71      | 0.078     | 0.77                          | 7.17 | 235.7                              | 0.24                              | 0.29            | 0.19            | 0.55            |
| S1 : high   | 0.74      | 0.12      | 0.61                          | 7.20 | 321.7                              | 0.26                              | 0.26            | 0.48            | 0.35            |
| S11B : high | 0.31      | 0.042     | 0.33                          | 7.33 | 407.9                              | 0.25                              | 0.25            | 0.27            | 1.25            |
| S11B : low  | 0.4       | 0.042     | 0.33                          | 7.33 | 407.9                              | 0.25                              | 0.25            | 0.27            | 1.25            |
| S5 : high   | 0.17      | 0.037     | 0.06                          | 7.63 | 319.2                              | 0.22                              | 0.57            | 0.17            | 0.27            |

**Table S3.** Pearson correlation coefficients between temperature and physical and chemical variables

1

| Variable        | <i>r</i> | P value |
|-----------------|----------|---------|
| width           | -0.14    | 0.56    |
| depth           | 0.07     | 0.77    |
| velocity        | 0.04     | 0.87    |
| pH              | -0.03    | 0.91    |
| conductivity    | -0.02    | 0.92    |
| NO <sub>2</sub> | -0.001   | 0.47    |
| NO <sub>3</sub> | 0.18     | 0.47    |
| NH <sub>4</sub> | -0.19    | 0.44    |
| PO <sub>4</sub> | 0.07     | 0.77    |

2 **Table S4.** The photosynthetic traits governing the thermal response curves for the dominant biofilms of each stream.

| Stream      | Year | Taxon       | Net photosynthesis                                                                              |                  |               |                            |                                   | Respiration                                                                                    |               |               |                            |                                   | Gross photosynthesis                                                                            |                  |               |                            |                                   |
|-------------|------|-------------|-------------------------------------------------------------------------------------------------|------------------|---------------|----------------------------|-----------------------------------|------------------------------------------------------------------------------------------------|---------------|---------------|----------------------------|-----------------------------------|-------------------------------------------------------------------------------------------------|------------------|---------------|----------------------------|-----------------------------------|
|             |      |             | $\ln np(T_c)$<br>( $\mu\text{mol O}_2 \mu\text{g Chla}^{-1} \text{h}^{-1} @ 10^\circ\text{C}$ ) | $E_{np}$<br>(eV) | $E_h$<br>(eV) | $T_h$ ( $^\circ\text{C}$ ) | $T_{opt}$<br>( $^\circ\text{C}$ ) | $\ln r(T_c)$<br>( $\mu\text{mol O}_2 \mu\text{g Chla}^{-1} \text{h}^{-1} @ 10^\circ\text{C}$ ) | $E_r$<br>(eV) | $E_h$<br>(eV) | $T_h$ ( $^\circ\text{C}$ ) | $T_{opt}$<br>( $^\circ\text{C}$ ) | $\ln gp(T_c)$<br>( $\mu\text{mol O}_2 \mu\text{g Chla}^{-1} \text{h}^{-1} @ 10^\circ\text{C}$ ) | $E_{gp}$<br>(eV) | $E_h$<br>(eV) | $T_h$ ( $^\circ\text{C}$ ) | $T_{opt}$<br>( $^\circ\text{C}$ ) |
| S4          | 2016 | Cladophora  | 3.9                                                                                             | 1.03             | 4.39          | 30.6                       | 28.48                             | 2.48                                                                                           | 1.01          | 3.78          | 31.66                      | 29.53                             | 4.2                                                                                             | 0.92             | 9.19          | 32.49                      | 30.57                             |
| S1A         | 2016 | Cladophora  | 4.74                                                                                            | 0.79             | 2.58          | 28.33                      | 25.88                             | 3.07                                                                                           | 0.64          | 4.36          | 37.28                      | 33.97                             | 4.77                                                                                            | 0.89             | 2.71          | 26.98                      | 24.95                             |
| S1A         | 2016 | Nostoc      | 4.37                                                                                            | 0.52             | 8.77          | 36.87                      | 34.28                             | 3.14                                                                                           | 0.44          | 4.26          | 38.83                      | 34.63                             | 4.8                                                                                             | 0.47             | 2.72          | 35.36                      | 30.71                             |
| S4          | 2015 | Cladophora  | 3.55                                                                                            | 0.87             | 1.78          | 21.67                      | 21.52                             | 1.71                                                                                           | 0.45          | 17.21         | 43.78                      | 41.97                             | 3.61                                                                                            | 0.53             | 2.18          | 30.18                      | 26.1                              |
| S7 : high   | 2016 | Cladophora  | 4.35                                                                                            | 0.73             | 7.04          | 31.77                      | 29.33                             | 3.85                                                                                           | 0.8           | 2.94          | 31.06                      | 28.42                             | 4.48                                                                                            | 0.93             | 3.51          | 28.24                      | 25.99                             |
| S7 : high   | 2016 | Nostoc      | 2.67                                                                                            | 0.98             | 3.57          | 34.32                      | 32.1                              | 1.27                                                                                           | 0.93          | 1.77          | 34.12                      | 34.59                             | 3.33                                                                                            | 0.62             | 9.05          | 38.83                      | 36.43                             |
| S7 : high   | 2015 | Feathermoss | 1.32                                                                                            | 0.77             | 4.99          | 34.19                      | 31.44                             | 1.26                                                                                           | 0.55          | 2.13          | 42.8                       | 38.64                             | 1.99                                                                                            | 0.66             | 8.81          | 35.6                       | 33.28                             |
| S11A        | 2016 | Nostoc      | 2.67                                                                                            | 1.91             | 5.29          | 28.47                      | 27.62                             | 1.13                                                                                           | 0.71          | 5.85          | 45.74                      | 42.79                             | 2.95                                                                                            | 1.57             | 4.37          | 28.46                      | 27.43                             |
| S10         | 2016 | Nostoc      | 2.68                                                                                            | 1.08             | 9.9           | 38.53                      | 36.76                             | -0.66                                                                                          | 1.64          | 3.15          | 34.74                      | 34.94                             | 3.42                                                                                            | 0.85             | 7.12          | 38.39                      | 36.06                             |
| S1 : high   | 2016 | Nostoc      | 3.77                                                                                            | 1.03             | 8.87          | 39.61                      | 37.69                             | 1.33                                                                                           | 1.09          | 3.23          | 41.01                      | 39.26                             | 4.36                                                                                            | 0.85             | 3.66          | 37.86                      | 35.15                             |
| S11b : high | 2015 | Feathermoss | 1.82                                                                                            | 1.12             | 2.64          | 24.53                      | 23.64                             | 1.1                                                                                            | 0.48          | 1.64          | 49.7                       | 45                                | 2.08                                                                                            | 1.14             | 2.5           | 25.19                      | 24.64                             |
| S5 : high   | 2015 | Anabaena    | 2.58                                                                                            | 0.54             | 5.9           | 42.5                       | 39.19                             | 0.68                                                                                           | 0.66          | 2.04          | 39.71                      | 36.65                             | 2.73                                                                                            | 0.55             | 5.69          | 42.37                      | 39.02                             |
| S5 : high   | 2016 | Anabaena    | 2.66                                                                                            | 0.85             | 4.02          | 37.4                       | 34.71                             | 0.45                                                                                           | 1.58          | 2.35          | 29.63                      | 32.12                             | 2.79                                                                                            | 0.77             | 5.63          | 39.89                      | 37.14                             |

3

4 **Table S5.** Results of a linear effects model analysis for each metabolic trait with fixed  
 5 effects of stream temperature and metabolic flux (see Methods). Significant models  
 6 are highlighted in bold.

| Metabolic Trait | Effect                                                     | d.f. | AIC     | Log Lik | L-ratio | P value           |
|-----------------|------------------------------------------------------------|------|---------|---------|---------|-------------------|
| $b(T_c)$        | ~ 1 + stream temperature *<br>metabolic flux               | 8    | 96.94   | -40.47  |         |                   |
|                 | ~ <b>1 + stream temperature</b><br><b>+ metabolic flux</b> | 6    | 94.89   | -41.43  | 1.93    | 0.37              |
|                 | ~ 1 + metabolic flux                                       | 5    | 98.28   | -44.14  | 5.41    | <b>0.02</b>       |
| $E_a$           | ~ 1 + stream temperature *<br>metabolic flux               | 8    | 37.03   | -10.51  |         |                   |
|                 | ~ 1 + stream temperature +<br>metabolic flux               | 6    | 36.36   | -12.18  | 3.33    | 0.189             |
|                 | ~ 1 + stream temperature                                   | 4    | 34.41   | -13.21  | 2.05    | 0.36              |
|                 | ~ <b>1</b>                                                 | 3    | 32.92   | -13.46  | 0.51    | 0.48              |
| $E_h$           | ~ 1 + stream temperature *<br>metabolic flux               | 8    | 72.92   | -28.46  |         |                   |
|                 | ~ 1 + stream temperature +<br>metabolic flux               | 6    | 73.83   | -30.91  | 4.91    | 0.09              |
|                 | ~ 1 + metabolic flux                                       | 5    | 72.07   | -31.04  | 0.24    | 0.62              |
|                 | ~ <b>1</b>                                                 | 3    | 71.37   | -32.68  | 3.30    | 0.19              |
| $T_h$           | ~ 1 + stream temperature *<br>metabolic flux               | 8    | -192.08 | 104.04  |         |                   |
|                 | ~ <b>1 + stream temperature</b><br><b>+ metabolic flux</b> | 6    | -192.92 | 102.46  | 3.15    | 0.206             |
|                 | ~ 1 + metabolic flux                                       | 5    | -190.32 | 100.16  | 4.60    | <b>0.032</b>      |
| $T_{opt}$       | ~ 1 + stream temperature *<br>metabolic flux               | 8    | -27.21  | 21.61   |         |                   |
|                 | ~ <b>1 + stream temperature</b><br><b>+ metabolic flux</b> | 6    | -28.72  | 20.36   | 2.49    | 0.29              |
|                 | ~ 1 + metabolic flux                                       | 5    | -24.54  | 17.27   | 6.18    | <b>0.013</b>      |
| $b(T_s)$        | ~ 1 + stream temperature *<br>metabolic flux               | 8    | 48.64   | -16.32  |         |                   |
|                 | ~ 1 + stream temperature +<br>metabolic flux               | 6    | 44.68   | -16.34  | 0.05    | 0.98              |
|                 | ~ <b>1 + metabolic flux</b>                                | 5    | 42.99   | -16.49  | 0.31    | 0.58              |
|                 | ~ <b>1</b>                                                 | 4    | 64.21   | -29.10  | 25.22   | <b>&lt;0.0001</b> |

7



8  
9

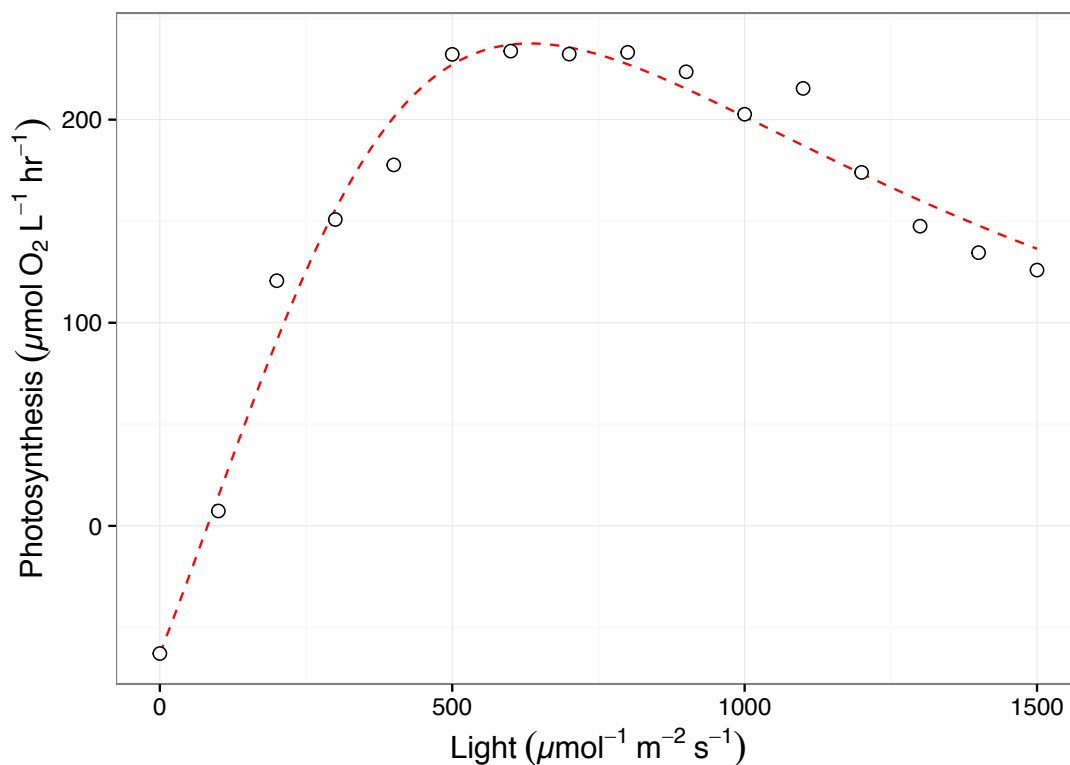

10

11 **Fig S2. Photosynthesis irradiance curve used to determine optimal light for the**

12 **acute temperature response of gross photosynthesis.** Rates of net photosynthesis

13 were measured at various light intensities at the average stream temperature of each

14 biofilm. Here data are presented for *Nostoc spp.* in stream 7 (high) at 7.1 °C. Lines

15 represent the best fit to the modified Eiler's model using non-linear least squares

16 regression (See methods).

17

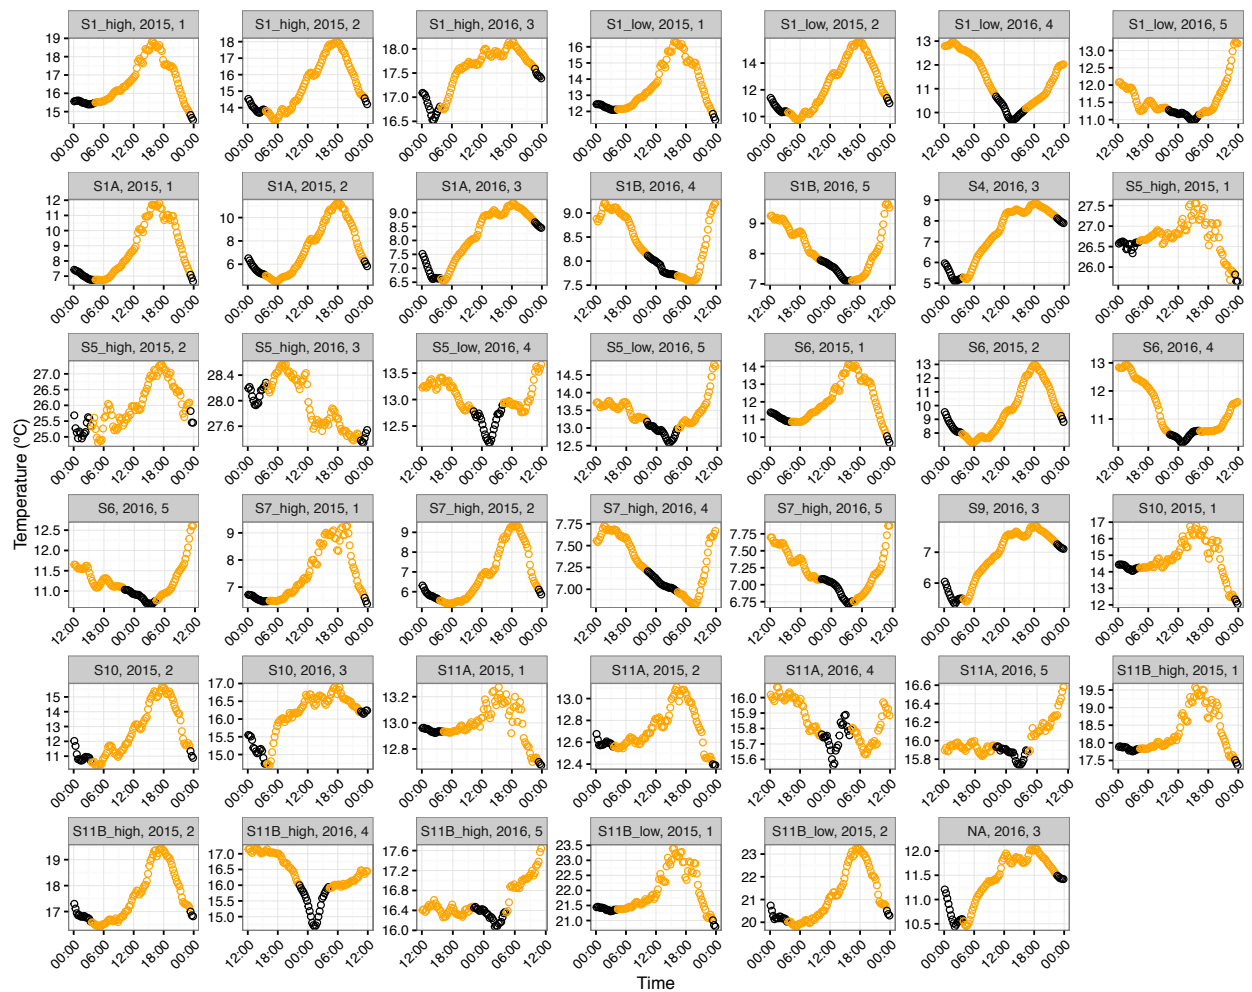

18

19 **Fig S3. Daily cycles in temperature from each stream across days and years.**

20 Each panel is a single day of temperature variation split by each unique stream and

21 across years (2015 or 2016). The data is split into “night” (black points) and “day”

22 (yellow points) by defining night as  $< 5 \mu\text{mol m}^{-2} \text{s}^{-1}$  (see Methods).

23

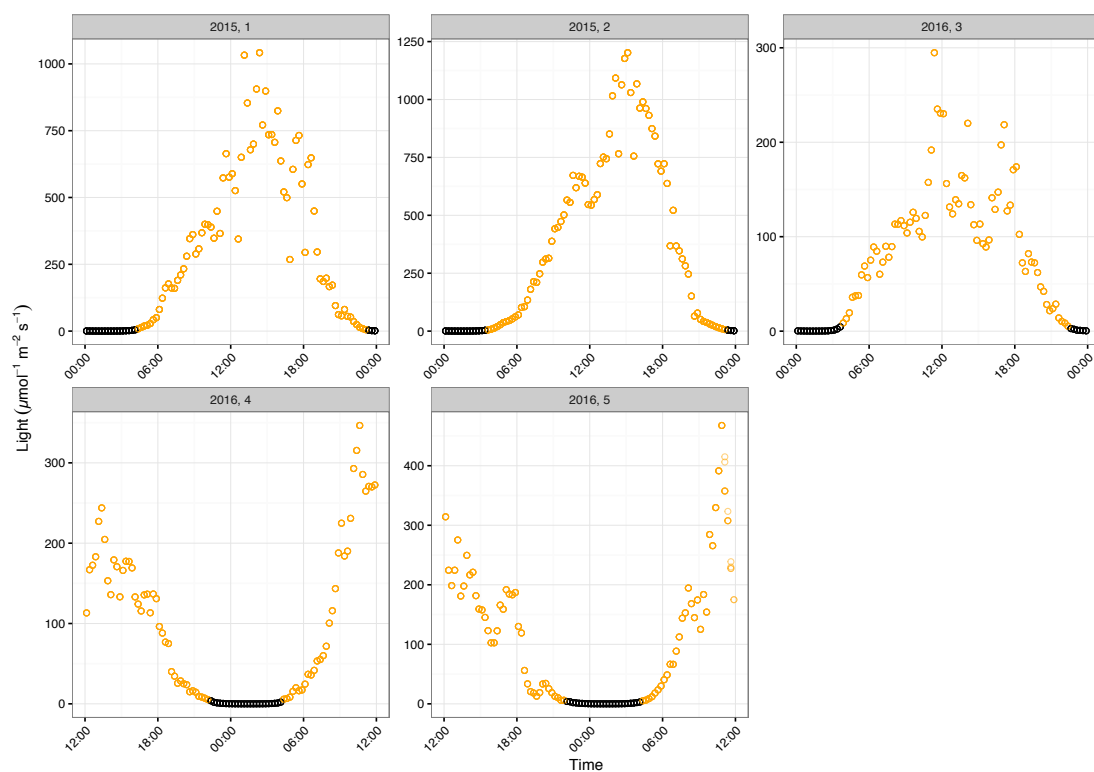

24

25 **Fig S4. Daily cycles in light from across days and years.** Each panel is a single day  
26 of light variation split by each unique stream and across years (2015 or 2016). The  
27 data is split into “night” (black points) and “day” (yellow points) by defining night as  
28  $< 5 \mu\text{mol m}^{-2} \text{s}^{-1}$  (see Methods).

29

30

31

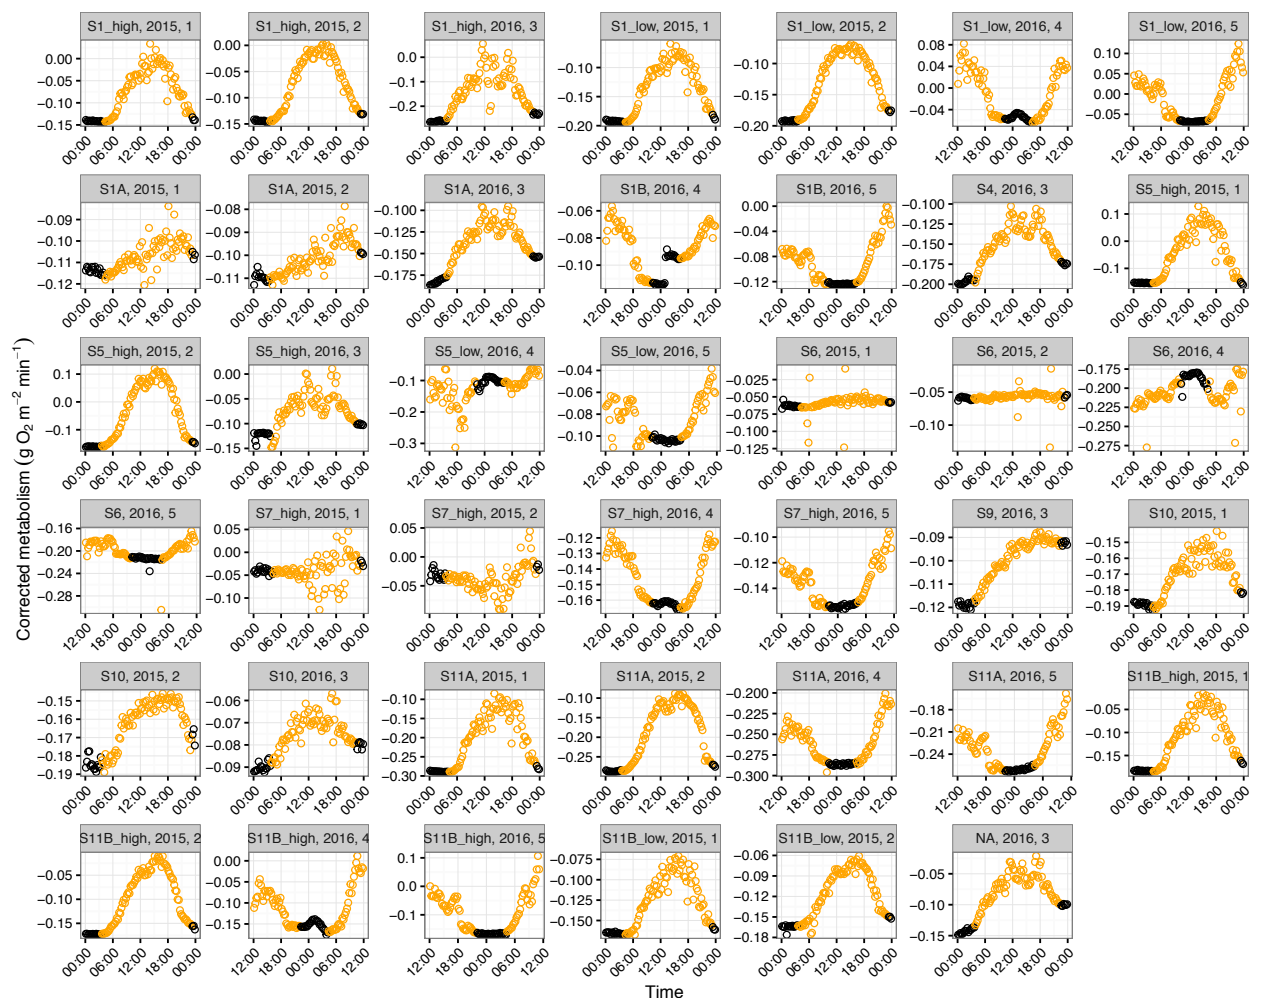

32

33 **Fig S5. Daily cycles in metabolic flux from each site across days and years. Each**

34 panel is a single day of metabolic rate after accounting for reaeration ( $\Delta DO - K$ ; see

35 Methods) split by each unique stream and across years (2015 or 2016). The data is

36 split into “night” (black points) and “day” (yellow points) by defining night as <

37  $5 \mu\text{mol m}^{-2} \text{s}^{-1}$  (see Methods).

38

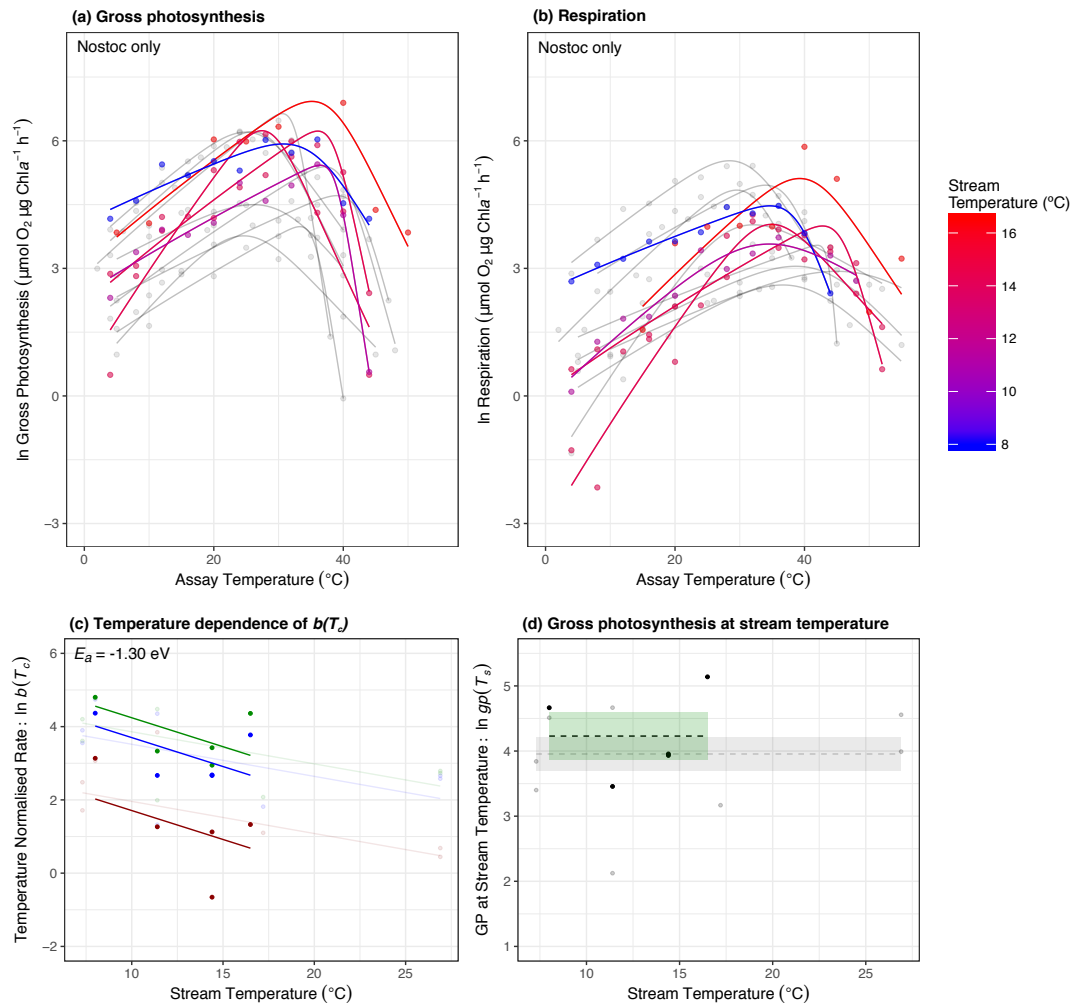

39

40 **Fig S6. Patterns of thermal adaptation in *Nostoc* spp. only.** (a) (a,b) Acute thermal  
41 response curves for gross photosynthesis and respiration were measured for each  
42 isolated autotroph from streams spanning average temperatures from 7  $^{\circ}\text{C}$  (blue) to 17  
43  $^{\circ}\text{C}$  (red) for stream biofilms dominated by *Nostoc* spp. (c) Optimum temperatures  
44 were consistently higher than the average stream temperature. (c) Metabolic rates  
45 normalised to 10  $^{\circ}\text{C}$ ,  $b(T_c)$ , decrease exponentially with increasing stream  
46 temperature for gross photosynthesis (green), net photosynthesis (blue) and  
47 respiration (red). (d) Rates of gross photosynthesis at the average stream temperature  
48 showed no temperature dependence. Grey points and lines highlight the other taxa to  
49 facilitate direct comparison to the relationship for *Nostoc* spp.

50

## 51 Section 2. Supplementary Methods.

52 **Derivation of the activation energy of net photosynthesis.** The rate of net  
53 photosynthesis,  $np(T)$ , at temperature,  $T$ , is equal to the difference between the rates  
54 of gross photosynthesis,  $gp(T)$ , and respiration,  $r(T)$ . Equation 5 (main text) implies  
55 that the temperature sensitivity of net photosynthesis will not follow a simple  
56 Boltzmann-Arrhenius relationship. Instead, the apparent activation energy of net  
57 photosynthesis,  $E_{np}$ , can be approximated in the vicinity of  $T_c$  as (Yvon-Durocher *et*  
58 *al.* 2014),

$$59 \quad E_{np} \equiv \frac{d \ln(np(T))}{d\left(\frac{1}{kT}\right)} \Bigg|_{T=T_c} = \frac{E_{gp} gp(T_c) + E_r r(T_c)}{gp(T_c) + r(T_c)} \quad (S1)$$

60 which is equal to an average of the activation energies of  $E_{gp}$  and  $E_r$ , weighted by  
61 their respective normalisations,  $gp(T_c)$  and  $r(T_c)$ . Using this approximation, we can  
62 then express the temperature dependence of  $np$  as

$$63 \quad np(T) = np(T_c) m^\alpha e^{E_{np} \left(\frac{1}{kT_c} - \frac{1}{kT}\right)} \quad (S2)$$

64 where  $np(T_c) = gp(T_c) - r(T_c)$ . We quantified the accuracy of this approximation  
65 by comparing  $E_{np}$  derived using eq. S1 to the apparent activation energy of net  
66 photosynthesis measured by fitting eq. (1) to the net photosynthesis data (see  
67 Methods). The derived and measured estimates of  $E_{np}$  were positively correlated with  
68 a slope that had confidence intervals which overlapped unity (slope = 1.22, 95% CI:  
69 0.78 – 1.65) and  $R^2 = 0.75$  (Fig. S7).

70

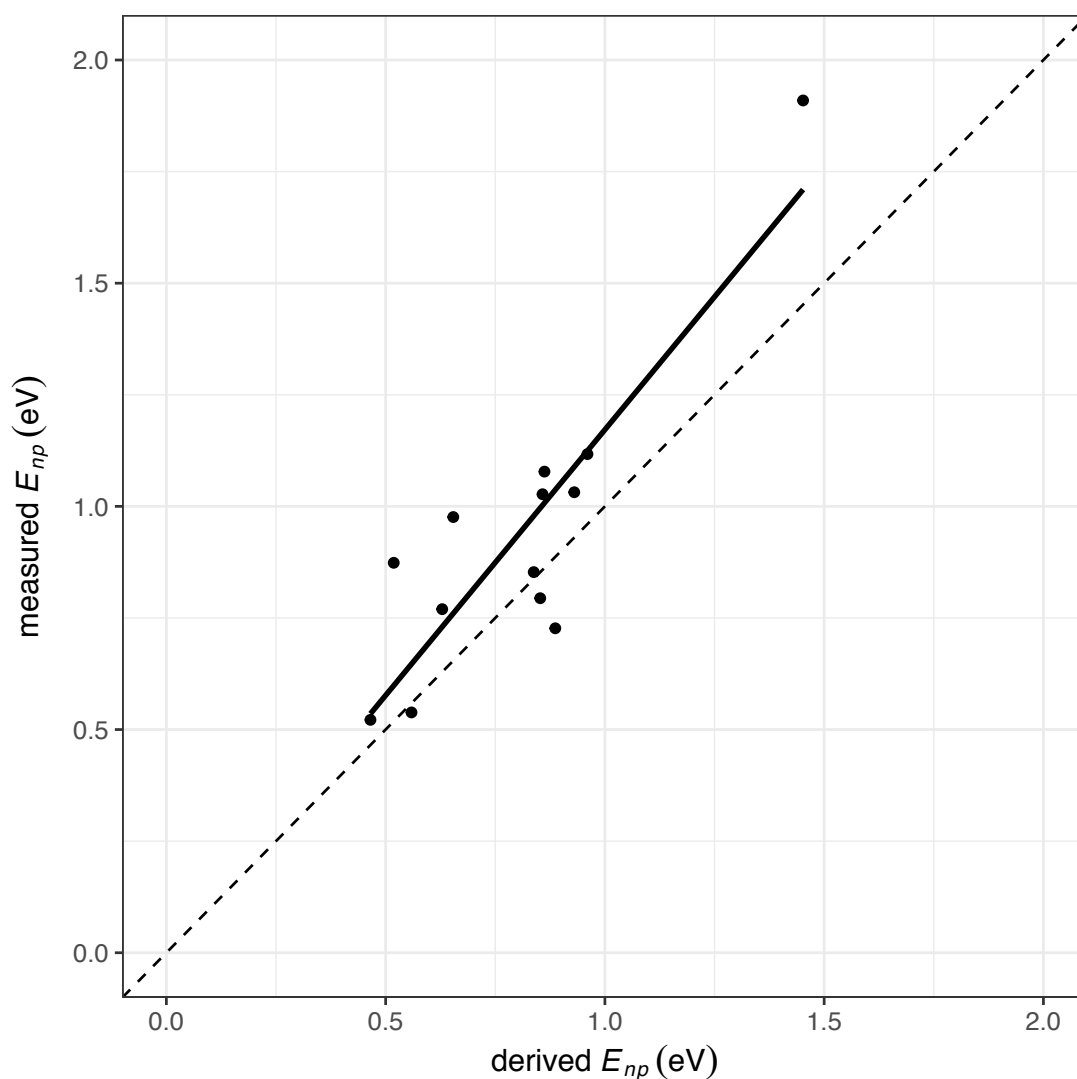

71

72 **Figure S7. Comparison between measured and derived activation energies for**  
73 **net photosynthesis.** Activation energies of net photosynthesis measured from fitting  
74 the rate data to the modified Sharpe-Schoolfield equation (eq. 1) correlate well with  
75 the derived activation energy of net photosynthesis calculated using equation S1. The  
76 fitted line is the best fit of a linear model and the 1:1 line is shown for comparison.

77

78

79 **Comparison of measured and modelled reaeration rates.** To assess the robustness  
80 of our modelled values of reaeration, we compared measurements of the reaeration  
81 rate made in nearby streams in Iceland with comparable physical characteristics using  
82 propane additions (from Demars *et al.* 2011), to values estimated using the surface  
83 renewal model (eq. 14, main text). In Demars *et al.* (2011), the reaeration rate was  
84 measured using a tracer study, where propane was bubbled continuously across the  
85 width of the stream at an upstream station. Water samples were taken at a downstream  
86 station and analysed by gas chromatography back in the laboratory (see for a more  
87 detailed description of the methods). The change in propane concentration the over  
88 the reach and the travel time were used to estimate the reaeration rate,  $K$  ( $\text{min}^{-1}$ ).

89 We compared the measured values of reaeration,  $K$  ( $\text{min}^{-1}$ ), from Demars *et al.*  
90 (2011) to estimated values of  $K$  derived Eq. 14 (main text) and measurements of  
91 velocity, depth and temperature for those streams. We found a strong correlation  
92 between modelled and measured values of  $K$  with 95% confidence intervals on the  
93 slope that included unity (slope = 1.13, 95% CI: 0.76 – 1.50) and an  $R^2 = 0.61$  (Fig.  
94 S8). Consequently, we are confident that estimates of reaeration derived from the  
95 surface renewal model are robust for the streams included in our survey.

96



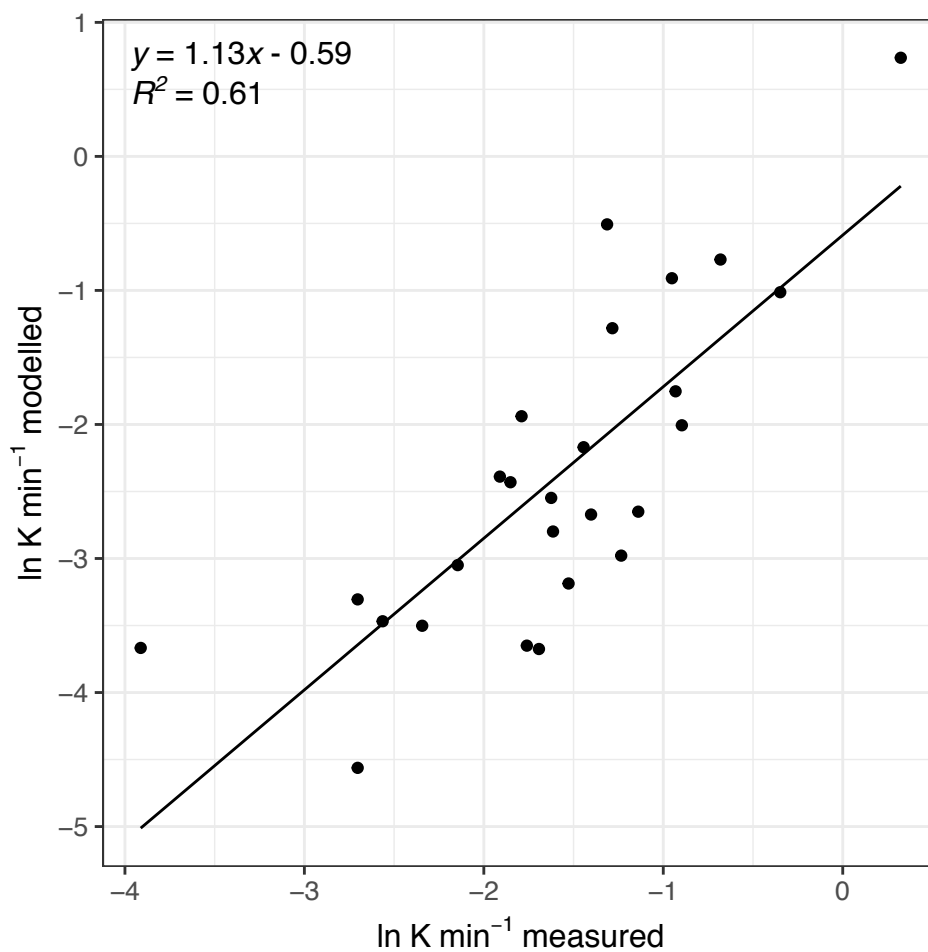

97

98 **Figure S8. Comparison of modelled and measured rates of reaeration.** Rates of  
99 measured reaeration using a propane tracer study are positively correlated with those  
100 derived using the surface renewal model (eq. 14; main text) with slope that was  
101 statistically indistinguishable from unity.
